# Supplementary material for: Network Pharmacology Prediction and Molecular Docking-Based Strategy to Discover the Potential Pharmacological Mechanism of Wen-Yu-Jin against Pulmonary Fibrosis in a Mouse Model
Source: Hindawi journal article supplement (doi:10.1155/2022/7753508), 2022-02-10
Supplement: f1 [file 7753508.f1.zip]

| Target | Uniprot ID | PDBID | Original Ligand | x       | y       | z      | Grid box |
|--------|------------|-------|-----------------|---------|---------|--------|----------|
| STAT3  | P40763     | 6NJS  | KQV             | 13.498  | 54.118  | 0.101  | 53*81*58 |
| SRC    | P12931     | 4XMO  | 46G             | 23.151  | 32.021  | 57.200 | 53*55*43 |
| IL-6   | P05231     | 1ALU  | -               | -0.315  | -19.932 | 8.838  | 48*50*40 |
| MAPK1  | P28482     | 4QTA  | 38Z             | 27.873  | 54.529  | 35.163 | 57*81*44 |
| AKT1   | P31749     | 4GV1  | 0XZ             | -20.286 | 3.748   | 11.736 | 50*49*52 |
| EGFR   | P00533     | 3POZ  | 03P             | 18.746  | 31.832  | 11.626 | 55*49*56 |
| MAPK8  | P45983     | 4L7F  | 1V5             | 39.787  | 1.607   | 73.990 | 34*49*40 |
| MAPK14 | Q16539     | 3ROC  | 29A             | 35.463  | 38.806  | 22.632 | 45*38*70 |
| IL1B   | P01584     | 5R8Q  | JGY             | 39.787  | 1.607   | 73.990 | 34*49*40 |

| Target | PDBID | References                                                                            |
|--------|-------|---------------------------------------------------------------------------------------|
| STAT3  | 6NJS  | <a href="https://www.rcsb.org/structure/6NJS">https://www.rcsb.org/structure/6NJS</a> |
| SRC    | 4XMO  | <a href="https://www.rcsb.org/structure/4XMO">https://www.rcsb.org/structure/4XMO</a> |
| IL-6   | 1ALU  | <a href="https://www.rcsb.org/structure/1ALU">https://www.rcsb.org/structure/1ALU</a> |
| MAPK1  | 4QTA  | <a href="https://www.rcsb.org/structure/4QTA">https://www.rcsb.org/structure/4QTA</a> |
| AKT1   | 4GV1  | <a href="https://www.rcsb.org/structure/4GV1">https://www.rcsb.org/structure/4GV1</a> |
| EGFR   | 3POZ  | <a href="https://www.rcsb.org/structure/3POZ">https://www.rcsb.org/structure/3POZ</a> |
| MAPK8  | 4L7F  | <a href="https://www.rcsb.org/structure/4L7F">https://www.rcsb.org/structure/4L7F</a> |
| MAPK14 | 3ROC  | <a href="https://www.rcsb.org/structure/3ROC">https://www.rcsb.org/structure/3ROC</a> |
| IL1B   | 5R8Q  | <a href="https://www.rcsb.org/structure/5R8Q">https://www.rcsb.org/structure/5R8Q</a> |

Prior to docking the ligands against the target proteins, the redocking of the co-crystal structures and their original ligands was carried out. All of the RMSDs was less than 2 Å which indicated the method for docking was reasonable.

| Target | RMSD   | Overlay of the docking result (green) and original ligand (blue)                     |  | Target | RMSD   | Overlay of the docking result (green) and original ligand (blue)                      |
|--------|--------|--------------------------------------------------------------------------------------|--|--------|--------|---------------------------------------------------------------------------------------|
| STAT3  | 1.7302 | 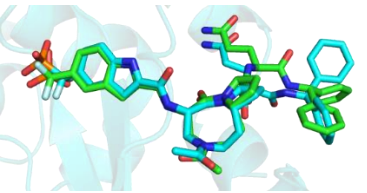   |  | MAPK1  | 1.2972 |    |
| SRC    | 0.3809 |    |  | AKT1   | 1.2037 |    |
| MAPK8  | 1.263  |   |  | EGFR   | 1.5066 |   |
| MAPK14 | 1.6399 |  |  | IL1B   | 0.1241 |  |
| IL-6   | -      | -                                                                                    |  |        |        |                                                                                       |

## The results of different affinity energy and Heat map of molecular docking

| Ligand                     | STAT3 | SRC   | IL-6 | MAPK1 | AKT1  | EGFR  | MAPK8 | MAPK14 | IL1B |
|----------------------------|-------|-------|------|-------|-------|-------|-------|--------|------|
| Gweicurculactone           | -4.6  | -7.7  | -6.4 | -8.1  | -7.4  | -7.7  | -7.9  | -7.3   | -5.9 |
| Ar-turmerone               | -5.1  | -8.2  | -6.0 | -8.4  | -7.0  | -7.6  | -7.3  | -7.9   | -6.3 |
| Curcumlactone              | -3.9  | -5.7  | -5.9 | -6.7  | -6.2  | -5.5  | -5.7  | -6.9   | -5.8 |
| (Z)-p-Methoxycinnamic acid | -4.8  | -6.5  | -5.6 | -6.7  | -5.0  | -6.7  | -5.8  | -6.0   | -4.8 |
| bisdemethoxycurcumin       | -7.4  | -10.1 | -6.4 | -10.3 | -8.8  | -9.2  | -10.3 | -10.8  | -6.9 |
| Epicurzerenone             | -5.0  | -5.9  | -5.4 | -6.7  | -6.3  | -5.6  | -5.6  | -6.7   | -4.8 |
| Curcumenolactone A         | -5.6  | -7.4  | -6.2 | -7.4  | -7.0  | -6.7  | -7.1  | -7.7   | -7.1 |
| Curcumenolactone B         | -6.2  | -7.2  | -5.9 | -7.5  | -8.1  | -6.9  | -6.8  | -8.2   | -6.8 |
| 1,2-Dihydrocurcumin        | -9.9  | -9.0  | -6.0 | -9.9  | -10.6 | -9.3  | -9.7  | -8.6   | -5.7 |
| Turneronol A               | -6.0  | -7.7  | -5.8 | -8.9  | -8.1  | -8.7  | -7.8  | -8.8   | -6.6 |
| Zedoarondiol               | -4.6  | -7.1  | -6.2 | -8.6  | -7.5  | -8.4  | -7.8  | -8.1   | -6.6 |
| Germacrone-13-al           | -2.7  | -5.8  | -6.1 | -5.3  | -4.7  | -5.8  | -4.2  | -6.7   | -4.7 |
| Procurecumiadiol           | -5.5  | -8.2  | -6.1 | -8.0  | -8.0  | -7.3  | -8.4  | -7.7   | -6.4 |
| Nintedanib                 | -10.3 | -8.4  | -8.0 | -10.6 | -9.9  | -10.1 | -11.2 | -9.5   | -7.6 |

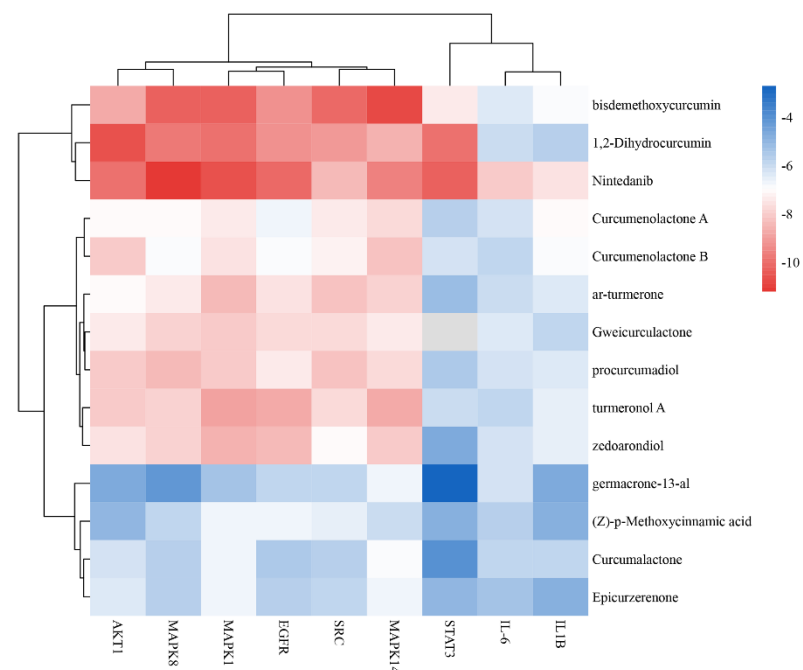

## Residues participating in the protein-ligand interactions

| Target | Ligand               | Interactions                                                     | 2D diagram                                                                            |
|--------|----------------------|------------------------------------------------------------------|---------------------------------------------------------------------------------------|
| STAT3  | Ar-turmerone         | Hydrogen Bond: Tyr640 (1)<br>Hydrophobic: Met648, Ile653, Lys658 | 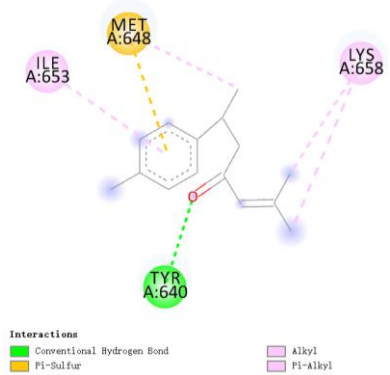   |
|        | Bisdemethoxycurcumin | Hydrogen Bond: Gln644, Tyr657 (2)<br>Hydrophobic: Glu638, Tyr640 |    |
|        | Curcumenolactone B   | Hydrogen Bond: Ser611, Ser613, Glu638 (3)<br>Hydrophobic: Pro639 |  |

|     |                     |                                                                                            |                                                                                                                                   |
|-----|---------------------|--------------------------------------------------------------------------------------------|-----------------------------------------------------------------------------------------------------------------------------------|
|     | 1,2-Dihydrocurcumin | <p>Hydrogen Bond: Lys615, Glu616, Gln644 (3)</p> <p>Hydrophobic: Glu638, Tyr640</p>        | <p>Interactions</p> <ul style="list-style-type: none"> <li>Conventional Hydrogen Bond</li> <li>Pi-Sigma</li> </ul>                |
|     | Turmeronol A        | <p>Hydrogen Bond: Glu638, Gln644 (2)</p> <p>Hydrophobic: Val637, Tyr640</p>                | <p>Interactions</p> <ul style="list-style-type: none"> <li>Conventional Hydrogen Bond</li> <li>Alkyl</li> <li>Pi-Alkyl</li> </ul> |
| SRC | Gweicurculactone    | <p>Hydrophobic: Ile1084, Val1092, Ala1108, Leu1140, Leu1157, Tyr1159, Met1211, Tyr1230</p> | <p>Interactions</p> <ul style="list-style-type: none"> <li>Pi-Sulfur</li> <li>Alkyl</li> <li>Pi-Alkyl</li> </ul>                  |

|  |                                   |                                                                                                         |                                                                                                                                                                                                                                |
|--|-----------------------------------|---------------------------------------------------------------------------------------------------------|--------------------------------------------------------------------------------------------------------------------------------------------------------------------------------------------------------------------------------|
|  | <p>(Z)-p-Methoxycinnamic acid</p> | <p>Hydrogen Bond: Met1160, Met1211, Asp1222 (3)<br/>Hydrophobic: Val1092, Ala1108, Leu1157, Met1211</p> | 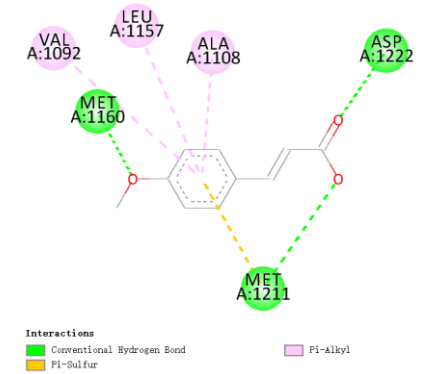 <p>Interactions</p> <ul style="list-style-type: none"> <li>Conventional Hydrogen Bond</li> <li>Pi-Sulfur</li> <li>Pi-Alkyl</li> </ul>      |
|  | <p>Bisdemethoxycurcumin</p>       | <p>Hydrogen Bond: Ile1084, Arg1208 (2)<br/>Hydrophobic: Ile1084, Tyr1159, Met1211, Tyr1230</p>          |  <p>Interactions</p> <ul style="list-style-type: none"> <li>Conventional Hydrogen Bond</li> <li>Pi-Pi Stacked</li> <li>Pi-Alkyl</li> </ul>  |
|  | <p>1,2-Dihydrocurcumin</p>        | <p>Hydrogen Bond: Met1160, Asp1222 (3)<br/>Hydrophobic: Val1092, Ala1108, Met1211, Tyr1230</p>          |  <p>Interactions</p> <ul style="list-style-type: none"> <li>Conventional Hydrogen Bond</li> <li>Pi-Pi Stacked</li> <li>Pi-Alkyl</li> </ul> |

|     |                |                                                                                                            |                                                                                                                                                                                                                                         |
|-----|----------------|------------------------------------------------------------------------------------------------------------|-----------------------------------------------------------------------------------------------------------------------------------------------------------------------------------------------------------------------------------------|
|     | Procurcumadiol | <p>Hydrogen Bond: Arg1086, Tyr1230 (2)</p> <p>Hydrophobic: Ile1084, Val1092, Met1211, Ala1226, Tyr1230</p> |  <p>Interactions</p> <ul style="list-style-type: none"> <li>Conventional Hydrogen Bond</li> <li>Alkyl</li> <li>PI-Alkyl</li> </ul>                   |
| IL6 | Ar-turmerone   | <p>Hydrogen Bond: Arg179 (1)</p> <p>Hydrophobic: Arg30, Leu33, Leu178</p>                                  |  <p>Interactions</p> <ul style="list-style-type: none"> <li>Conventional Hydrogen Bond</li> <li>PI-Sigma</li> <li>Alkyl</li> <li>PI-Alkyl</li> </ul> |
|     | Curcumalactone | <p>Hydrogen Bond: Leu64 (1)</p> <p>Hydrophobic: Leu62, Leu64, Lys66, Leu165</p>                            |  <p>Interactions</p> <ul style="list-style-type: none"> <li>Conventional Hydrogen Bond</li> <li>Alkyl</li> </ul>                                    |

|  |                      |                                                                                    |                                                                                      |
|--|----------------------|------------------------------------------------------------------------------------|--------------------------------------------------------------------------------------|
|  | Bisdemethoxycurcumin | <p>Hydrogen Bond: Ser107, Asp160 (2)</p> <p>Hydrophobic: Lys46, Arg104, Phe105</p> |   |
|  | Curcumenolactone A   | <p>Hydrogen Bond: Arg104, Gln156 (2)</p> <p>Hydrophobic: Phe105</p>                |   |
|  | Germacrone-13-al     | <p>Hydrogen Bond: Thr43, Glu106 (2)</p>                                            |  |



|       |                      |                                                                                                       |                                                                                      |
|-------|----------------------|-------------------------------------------------------------------------------------------------------|--------------------------------------------------------------------------------------|
| MAPK1 | Gweicurculactone     | <p>Hydrogen Bond: -</p> <p>Hydrophobic: Ala35, Tyr36, Ile56, Tyr64, Arg67</p>                         |   |
|       | Bisdemethoxycurcumin | <p>Hydrogen Bond: Lys54, Met108 (3)</p> <p>Hydrophobic: Val39, Ala52, Lys54, Ile56, Glu71, Leu156</p> |   |
|       | Epicurzerenone       | <p>Hydrogen Bond: Lys54 (1)</p> <p>Hydrophobic: Tyr36, Val39, Ala52, Lys54, Ile84, Leu156, Cys166</p> |  |

|      |                      |                                                                                                             |                                                                                                                                                                                                                                              |
|------|----------------------|-------------------------------------------------------------------------------------------------------------|----------------------------------------------------------------------------------------------------------------------------------------------------------------------------------------------------------------------------------------------|
| AKT1 | 1,2-Dihydrocurcumin  | <p>Hydrogen Bond: Lys54, Arg67, Asp106, Met108 (5)</p> <p>Hydrophobic: Val39, Ala52, Arg67, Leu156</p>      | 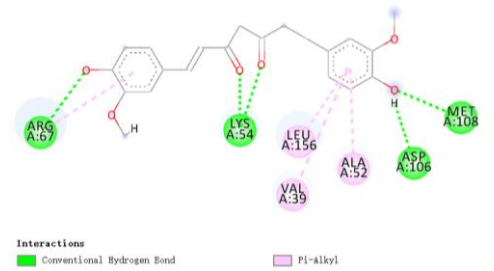 <p>Interactions</p> <ul style="list-style-type: none"> <li>Conventional Hydrogen Bond</li> <li>Pi-Alkyl</li> </ul>                                       |
|      | Zedoarondiol         | <p>Hydrogen Bond: Lys54, Ser153 (2)</p> <p>Hydrophobic: Tyr36, Val39, Val52, Leu156</p>                     |  <p>Interactions</p> <ul style="list-style-type: none"> <li>Conventional Hydrogen Bond</li> <li>Pi-Alkyl</li> <li>Alkyl</li> </ul>                        |
|      | Bisdemethoxycurcumin | <p>Hydrogen Bond: Glu191, Glu228, Ala230 (3)</p> <p>Hydrophobic: Val164, Ala177, Met227, Met281, Asp292</p> |  <p>Interactions</p> <ul style="list-style-type: none"> <li>Conventional Hydrogen Bond</li> <li>Pi-Anion</li> <li>Pi-Sulfur</li> <li>Pi-Alkyl</li> </ul> |
|      | Curcumenolactone A   | <p>Hydrogen Bond: Asp439 (1)</p> <p>Hydrophobic: Val164, Met281</p>                                         |  <p>Interactions</p> <ul style="list-style-type: none"> <li>Conventional Hydrogen Bond</li> <li>Alkyl</li> </ul>                                        |

|  |                     |                                                                                                             |                                                                                                                                                                                                                                                                                        |
|--|---------------------|-------------------------------------------------------------------------------------------------------------|----------------------------------------------------------------------------------------------------------------------------------------------------------------------------------------------------------------------------------------------------------------------------------------|
|  | 1,2-Dihydrocurcumin | <p>Hydrogen Bond: Glu191, Glu228 (2)</p> <p>Hydrophobic: Phe161, Val164, Ala177, Lys179, Met281, Asp292</p> | 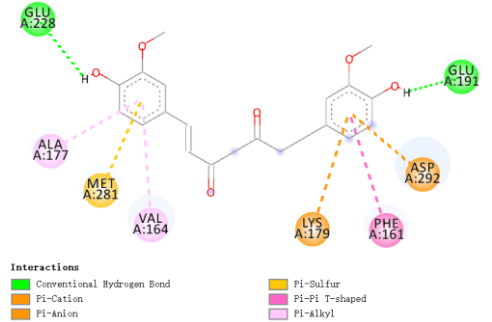 <p>Interactions</p> <ul style="list-style-type: none"> <li>Conventional Hydrogen Bond</li> <li>Pi-Cation</li> <li>Pi-Anion</li> <li>Pi-Sulfur</li> <li>Pi-Pi T-shaped</li> <li>Pi-Alkyl</li> </ul> |
|  | Turmeronol A        | <p>Hydrogen Bond: Glu228 (1)</p> <p>Hydrophobic: Leu156, Val164, Ala177, Met227, Met281, Phe438, Phe442</p> |  <p>Interactions</p> <ul style="list-style-type: none"> <li>Conventional Hydrogen Bond</li> <li>Pi-Sulfur</li> <li>Alkyl</li> <li>Pi-Alkyl</li> </ul>                                               |
|  | Procurcumadiol      | <p>Hydrogen Bond: Lys158, Asp292 (2)</p> <p>Hydrophobic: Leu156, Val164, Phe438</p>                         |  <p>Interactions</p> <ul style="list-style-type: none"> <li>Conventional Hydrogen Bond</li> <li>Alkyl</li> <li>Pi-Alkyl</li> </ul>                                                                 |

|      |                            |                                                                                                                     |                                                                                                                                   |
|------|----------------------------|---------------------------------------------------------------------------------------------------------------------|-----------------------------------------------------------------------------------------------------------------------------------|
| EGFR | Ar-turmerone               | <p>Hydrogen Bond: Thr854 (1)</p> <p>Hydrophobic: Val726, Ala743, Lys745, Met766, Leu788, Leu844, Phe856</p>         | <p>Interactions</p> <ul style="list-style-type: none"> <li>Conventional Hydrogen Bond</li> <li>Alkyl</li> <li>Pi-alkyl</li> </ul> |
|      | (Z)-p-Methoxycinnamic acid | <p>Hydrogen Bond: Asp855 (1)</p> <p>Hydrophobic: Lys745, Leu788</p>                                                 | <p>Interactions</p> <ul style="list-style-type: none"> <li>Conventional Hydrogen Bond</li> <li>Pi-alkyl</li> </ul>                |
|      | Bisdemethoxycurcumin       | <p>Hydrogen Bond: Met766, Cys775, Met793, Thr854 (4)</p> <p>Hydrophobic: Leu718, Ala743, Met766, Leu777, Leu844</p> | <p>Interactions</p> <ul style="list-style-type: none"> <li>Conventional Hydrogen Bond</li> <li>Pi-alkyl</li> </ul>                |

|       |                     |                                                                                                                     |                                                                                                                                                                                                                                                             |
|-------|---------------------|---------------------------------------------------------------------------------------------------------------------|-------------------------------------------------------------------------------------------------------------------------------------------------------------------------------------------------------------------------------------------------------------|
|       | 1,2-Dihydrocurcumin | <p>Hydrogen Bond: Lys745, Thr854, Phe856 (3)</p> <p>Hydrophobic: Leu718, Val726, Met766, Leu788, Phe856, Leu858</p> |  <p>Interactions</p> <ul style="list-style-type: none"> <li>Conventional Hydrogen Bond</li> <li>PI-PI T-shaped</li> <li>PI-Alkyl</li> </ul>                              |
|       | Zedoarondiol        | <p>Hydrogen Bond: Thr854 (1)</p> <p>Hydrophobic: Leu718, Lys745, Leu844</p>                                         |  <p>Interactions</p> <ul style="list-style-type: none"> <li>Conventional Hydrogen Bond</li> <li>Alkyl</li> </ul>                                                         |
| MAPK8 | Gweicurculactone    | <p>Hydrogen Bond: Met111 (1)</p> <p>Hydrophobic: Ile32, Val40, Ala53, Lys55, Met108, Leu110, Val158, Leu168</p>     |  <p>Interactions</p> <ul style="list-style-type: none"> <li>Conventional Hydrogen Bond</li> <li>PI-Sigma</li> <li>PI-Sulfur</li> <li>Alkyl</li> <li>PI-Alkyl</li> </ul> |

|  |                      |                                                                                                       |                                                                                       |
|--|----------------------|-------------------------------------------------------------------------------------------------------|---------------------------------------------------------------------------------------|
|  | Ar-turmerone         | <p>Hydrogen Bond: Lys55 (1)</p> <p>Hydrophobic: Ile32, Val40, Ala53, Lys55, Leu57, Leu168</p>         | 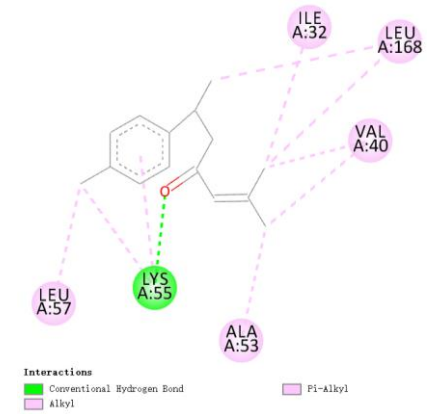   |
|  | Bisdemethoxycurcumin | <p>Hydrogen Bond: Lys55, Glu109, Asn114 (3)</p> <p>Hydrophobic: Ala53, Met108, Val158, Leu168</p>     |    |
|  | 1,2-Dihydrocurcumin  | <p>Hydrogen Bond: Lys55, Arg69, Glu73, Met111 (4)</p> <p>Hydrophobic: Ile32, Ala53, Lys55, Val158</p> |  |

|        |                      |                                                                                                               |                                                                                                                                                                                                                                          |
|--------|----------------------|---------------------------------------------------------------------------------------------------------------|------------------------------------------------------------------------------------------------------------------------------------------------------------------------------------------------------------------------------------------|
|        | Turmeronol A         | <p>Hydrogen Bond: Lys55, Glu73 (2)</p> <p>Hydrophobic: Val40, Ala53, Lys55, Glu73, Met108, Val158, Leu168</p> | 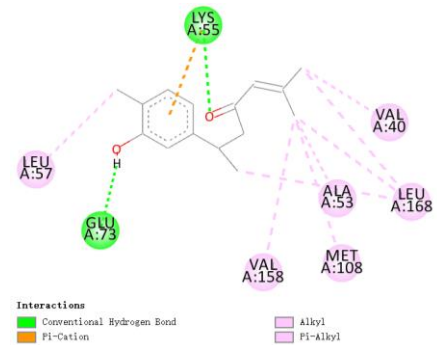 <p>Interactions</p> <ul style="list-style-type: none"> <li>Conventional Hydrogen Bond</li> <li>Pi-Cation</li> <li>Alkyl</li> <li>Pi-Alkyl</li> </ul> |
| MAPK14 | Bisdemethoxycurcumin | <p>Hydrogen Bond: Glu71, Met109, Gly110, Asp112 (4)</p> <p>Hydrophobic: Lys53, Ile84, Ala111, Leu167</p>      |  <p>Interactions</p> <ul style="list-style-type: none"> <li>Conventional Hydrogen Bond</li> <li>Aside-Pi Stacked</li> <li>Pi-Alkyl</li> </ul>         |
|        | Curcumenolactone A   | <p>Hydrogen Bond: Gly110 (1)</p> <p>Hydrophobic: Val30, Val38, Ala51, Ile84, Ala157, Leu167</p>               |  <p>Interactions</p> <ul style="list-style-type: none"> <li>Conventional Hydrogen Bond</li> <li>Alkyl</li> </ul>                                     |

|  |                     |                                                                                                                 |                                                                                                                                                                                                                        |
|--|---------------------|-----------------------------------------------------------------------------------------------------------------|------------------------------------------------------------------------------------------------------------------------------------------------------------------------------------------------------------------------|
|  | Curcumenolactone B  | <p>Hydrogen Bond: Met109, Gly110 (2)</p> <p>Hydrophobic: Val38, Ala51, Lys53, Ile84, Leu104, Ala157, Leu167</p> |  <p>Interactions</p> <ul style="list-style-type: none"> <li>Conventional Hydrogen Bond</li> <li>Alkyl</li> </ul>                    |
|  | 1,2-Dihydrocurcumin | <p>Hydrogen Bond: Val30, Met109, Gly110 (3)</p> <p>Hydrophobic: Val30, Ala51, Lys53</p>                         |  <p>Interactions</p> <ul style="list-style-type: none"> <li>Conventional Hydrogen Bond</li> <li>Pi-Alkyl</li> </ul>                 |
|  | Turmeronol A        | <p>Hydrogen Bond: Ala51, Met109 (2)</p> <p>Hydrophobic: Val38, Ala51, Lys53, Leu75, Ile84, Leu104, Ala157</p>   |  <p>Interactions</p> <ul style="list-style-type: none"> <li>Conventional Hydrogen Bond</li> <li>Alkyl</li> <li>Pi-Alkyl</li> </ul> |



|      |                      |                                                                                  |                                                                                                                                                        |
|------|----------------------|----------------------------------------------------------------------------------|--------------------------------------------------------------------------------------------------------------------------------------------------------|
| IL1B | Ar-turmerone         | <p>Hydrogen Bond: -</p> <p>Hydrophobic: Leu26, Lys77, Leu80, Leu82</p>           | 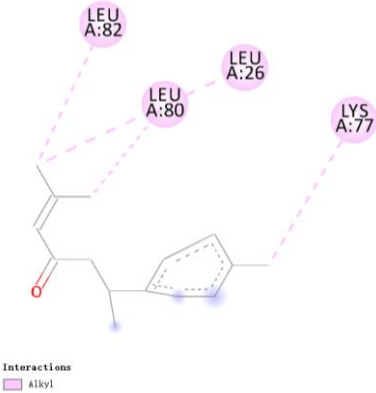 <p>Interactions</p> <p>Alkyl</p>                                   |
|      | Curcumalactone       | <p>Hydrogen Bond: Leu26 (1)</p> <p>Hydrophobic: Leu80, Leu82, Pro131, Val132</p> |  <p>Interactions</p> <p>Conventional Hydrogen Bond</p> <p>Alkyl</p> |
|      | Bisdemethoxycurcumin | <p>Hydrogen Bond: Glu25, Leu26, Lys74, Gln81, Val132 (5)</p>                     |  <p>Interactions</p> <p>Conventional Hydrogen Bond</p>             |

|  |                     |                                                               |                                                                                                                                                        |
|--|---------------------|---------------------------------------------------------------|--------------------------------------------------------------------------------------------------------------------------------------------------------|
|  | Curcumenolactone A  | <p>Hydrogen Bond: Lys74, Gln81 (2)<br/>Hydrophobic: Lys74</p> | 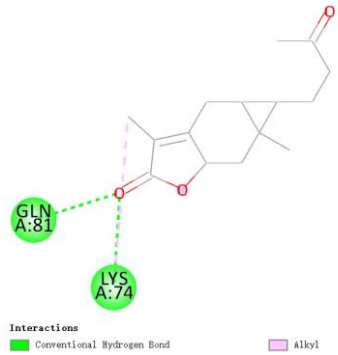 <p>Interactions</p> <p>Conventional Hydrogen Bond</p> <p>Alkyl</p> |
|  | 1,2-Dihydrocurcumin | <p>Hydrogen Bond: Glu25, Leu26, Lys74, Gln81, Val132 (6)</p>  |  <p>Interactions</p> <p>Conventional Hydrogen Bond</p>              |
