# Supplementary material for: Network Pharmacology Prediction and Molecular Docking-Based Strategy to Discover the Potential Pharmacological Mechanism of Wen-Yu-Jin against Pulmonary Fibrosis in a Mouse Model
Source: Hindawi journal article supplement (doi:10.1155/2022/7753508), 2022-02-10
Supplement: f1 [file 7753508.f1.zip]

**Supplementary Table S2** 846 Targets associated with IPF

TERT  
SFTPC  
SFTPA2  
MUC5B  
ABCA3  
TERC  
LOC110806263  
RTEL1  
SFTPA1  
RTEL1-TNFRSF6B  
IL6  
PARN  
DSP  
TNF  
COPA  
SFTPB  
FAM13A  
DPP9  
ATP11A  
STN1  
IFNG  
SFTPD  
CXCL8  
IL10  
TGFB1  
CRP  
MUC1  
HLA-DRB1  
PDGFRB  
IL4  
IL1B  
PDGFRA  
ALB  
CCL2  
MMP1  
PDGFB  
FARSB  
IL13  
IL17A  
ITGA3  
ACE  
ELANE  
TLR4  
STAT3  
CCL5  
MPO  
MMP9  
CFTR  
SERPINE1  
ICAM1  
ACTC1  
IL18  
IL1RN  
CXCR4  
CD4  
VEGFA

CD40LG  
IL5  
FOXP3  
FLNA  
CSF2  
IL2RA  
CXCR3  
ADA  
CCL3  
CXCL10  
CD8A  
TIMP1  
SLC2A1  
CAV1  
IL1A  
HLA-DQB1  
EDN1  
CASR  
TLR2  
SCN5A  
CHD7  
FGF2  
HMGB1  
IL2  
CSF3  
CCL18  
TNNI3  
PTPRC  
INPP5E  
CCN2  
TLR5  
ELN  
CXCL5  
EGFR  
AGT  
FGF8  
MIF  
TNF2  
CD34  
CCL17  
IGF1  
ITGAM  
SERPINA1  
CCR6  
SERPINH1  
PRTN3  
SCGB1A1  
CCR4  
CXCL9  
CXCL1  
FGFR1  
LACTB  
TP53  
HMOX1  
TNNT2  
FBN1  
CTLA4  
MMP2

IFIH1  
CCR7  
WT1  
HLA-DQA1  
NKX2-1  
MYH7  
CXCL12  
PPARG  
UMOD  
MBL2  
FASLG  
LRBA  
IL1R1  
CCL22  
HLA-B  
IL33  
MIR21  
TLR9  
PIK3C2A  
CHAT  
TRIM21  
REN  
ELMOD2  
IL2RB  
SPP1  
FN1  
TTN  
VCAM1  
MMP12  
BTK  
CXCR2  
AGTR1  
MMP7  
DMD  
KIT  
MMP8  
NKX2-5  
MUC5AC  
STAT5B  
EGF  
THBD  
APOE  
SHH  
B2M  
TNFRSF13B  
SPPL2C  
RAG1  
DES  
MYD88  
ACE2  
COL1A1  
AKT1  
NEU1  
GBA  
FOXF1  
NOS3  
CTNNB1  
CD79A

F2  
BDNF  
LMNA  
HIF1A  
BMP6  
GPT  
CR1  
NPHS1  
TGFB3  
ITGB2  
CDH1  
JUN  
CCR2  
TOLLIP  
AGER  
HLA-A  
CCL4  
FLNC  
H2AC18  
TGFB2  
IL13RA2  
STAT4  
CCL11  
HGF  
HARS1  
THBS1  
INS  
BMP4  
MYH6  
COL3A1  
CMA1  
SELL  
CHI3L1  
CCR5  
GAPDH  
HPS1  
TF  
DKC1  
SMPD1  
POSTN  
FCGR2A  
FAS  
CALCA  
PKD1  
C3  
CXCR1  
MAPK3  
MYLK  
MIR140  
PDCD1  
SPARC  
LGALS3  
COL1A2  
IGFBP3  
STING1  
NPHP4  
S100A1  
ICOSLG

ATP4A  
ALOX5  
MAPT  
ACP5  
MRC1  
GREM1  
COL4A5  
ENG  
VIM  
LEP  
RNASE3  
ATP12A  
NLRP3  
VCL  
CYBB  
SMAD3  
F3  
LTA  
TLR3  
MIR155  
TNC  
ADRB2  
PDGFA  
GSN  
SMAD2  
ICOS  
ADM  
HSPD1  
MMP3  
NOX4  
IL9  
NFKB1  
NHP2  
NOP10  
TNFRSF11A  
SERPINA3  
IFNA1  
TNFRSF1A  
SMAD4  
FGF7  
SLPI  
LAMP2  
KRT18  
FGFR3  
GATA4  
PRL  
IL7R  
ACTB  
NOS1  
CFH  
HP  
SIGLEC5  
INVS  
LOXL2  
PMPCA  
RYS1  
MIR214  
LIG4

NOD2  
THPO  
CACNA1C  
FHIT  
ARG1  
FKTN  
PTPN11  
GRP  
TAC1  
MIR199A1  
ENPP2  
PKD2  
SNCA  
ADCY10  
MIR30A  
F5  
CASP3  
STAT6  
TBX4  
TGFB1  
PTEN  
S100A4  
AGTR2  
LOX  
CD274  
NGF  
DEFB4A  
NPPB  
AR  
NCF2  
DSG2  
TERF1  
VTN  
NCF1  
NPC2  
CCN4  
LAMA2  
CYP1A1  
TRPV1  
TSLP  
IGHE  
IL15  
PRKCD  
WRAP53  
LPAR1  
THY1  
CCND1  
SMAD7  
LAMC2  
DDR1  
CXCL2  
TREM1  
MIRLET7D  
CD36  
S100A12  
ITGA4  
LBP  
IFNB1

KRAS  
IL3  
SNAI1  
LOC106627981  
SELE  
PLAT  
PTGS2  
IL22  
GSTM1  
IGFBP5  
CYBA  
SOD1  
CD40  
CD27  
ITGAL  
TMEM67  
S100A9  
CD44  
GAA  
ATM  
MIR142  
KNG1  
HFE  
TNFSF13B  
MIR130A  
RET  
MYPN  
CSF2RB  
CD14  
MYL3  
BPI  
NPPA  
CP  
FIP1L1  
NOS2  
SOD2  
TGIF1  
RBP4  
PTCH1  
FGF10  
PLA2G6  
MIR34C  
SREBF1  
CD69  
MYL2  
MIR409  
TP63  
MIR338  
MIR708  
CASP8  
MS4A1  
SERPINB1  
SLC11A1  
MB  
VWF  
BMP2  
ESR1  
RAC2

SOD3  
VDR  
TNFSF11  
SERPINC1  
TH  
AXL  
ERF  
IL4R  
PAX2  
CD81  
ADRB3  
GZMB  
CASP1  
FLNC-AS1  
SELP  
HDAC9  
LYZ  
EDN3  
DHFR  
MALT1  
TNFSF12  
EXOSC10  
DNAH11  
EPO  
IFNA2  
MIR15A  
PRDM16  
KITLG  
HRH2  
CLCN5  
TNFRSF1B  
CD1C  
PLG  
TIMP3  
HAVCR1  
PKHD1  
LTF  
CD1A  
GLA  
ALMS1  
MIR146A  
JAK3  
CREBBP  
NPC1  
PRKAG2  
APP  
ABCB1  
ASCL1  
TACR1  
IL1RAPL2  
MTHFR  
MYC  
GSTP1  
CYP2C19  
TTR  
HYDIN  
CSF3R  
CFI



IL12A  
STAT1  
RAC1  
CCR3  
CHIT1  
GSTT1  
MAPK14  
LAMA3  
LCN2  
MAPK1  
SCARB2  
ACTA1  
TRPV4  
APOH  
VIP  
GJB2  
CD80  
CD86  
EP300  
FAM111B  
CRYAB  
KCNQ1  
ADIPOQ  
NAGLU  
BRAF  
ANXA5  
PTGS1  
GJA1  
CPT2  
SDC1  
ITGB3  
RARA  
PADI4  
PLAU  
GATA6  
IGF2  
IRF5  
NTRK1  
MTOR  
CD28  
FCGR3A  
SLC17A5  
RSPH9  
IFNGR1  
MT-CYB  
NTF3  
TIMP2  
ANO1  
IL7  
CRHR1  
ITGB1  
HLA-C  
ERBB2  
BAX  
IL11  
PECAM1  
SST  
NCAM1

BCL2  
MIR25  
COL2A1  
DCN  
EPRS1  
DYNC2H1  
CAT  
TLR6  
DNAH8  
CSF2RA  
NR3C1  
NFE2L2  
COL4A1  
IL13RA1  
MIR34A  
MECP2  
CC2D2A  
IKBK  
HSPG2  
CSF1  
SRC  
PLAUR  
COL6A2  
DNAH1  
CDH2  
DNAAF1  
DNAAF11  
NOTCH1  
ANGPT2  
RSPH1  
MYH2  
TYK2  
CYP19A1  
MDM2  
EDNRA  
GHRL  
NAMPT  
CTSB  
TNFRSF8  
RASGRP1  
ADAM17  
ANGPT1  
MAPK8  
CXCL13  
MARCO  
CYCS  
CTSG  
MIR181A2  
PINK1  
CFAP298  
ENO2  
APOA1  
CDKN2A  
ILK  
CDKN1A  
PRODH  
KIF20A  
PPARA

ABL1  
HSPA4  
CD55  
C5  
LEPR  
SYP  
CCR1  
FCGR3B  
RHOA  
DPP4  
IL17F  
SYK  
NCF4  
TLR1  
TLR7  
HMGCR  
KDR  
TBX1  
IDO1  
CYP2D6  
ACADVL  
TRB  
C4A  
NPY  
APOB  
CST3  
SETBP1  
CCL21  
LAMP1  
IRF3  
JAK1  
HSP90AA1  
KL  
AARS1  
TCIRG1  
PGR  
RAD51  
FOXJ1  
ENO1  
GUSB  
KRT7  
NTRK3  
AQP5  
CCL19  
EPHX1  
PTX3  
IKZF1  
AP3D1  
BSG  
MCL1  
XIAP  
CREB1  
JUP  
G6PD  
MMP13  
CLU  
GLI3  
GDF15

SERPINF2  
SETD2  
HAVCR2  
TARS1  
PSMB8  
CCL24  
S100B  
GFAP  
CD163  
TERF2  
MME  
PPBP  
ITGAV  
XDH  
ABCA1  
PARK7  
ERCC6  
COL4A2  
CDH5  
NLRC4  
LIF  
CTSD  
IRF1  
CHGA  
NQO1  
GBE1  
VDAC1  
TBX5  
IGF2R  
TARDBP  
RAB8A  
IGF1R  
ACHE  
MSN  
SLC34A2  
CCR8  
MMP14  
NOD1  
H2AX  
CXCL11  
BMP7  
TLL1  
ANXA6  
SIRT1  
COL7A1  
HSPA5  
STX1A  
MIR145  
MIR223  
CCL26  
BRCA1  
RELA  
MICA  
IL1RL1  
IL12RB1  
CTSL  
FCN2  
TNFAIP3

DNAJB13  
MIR27A  
CCL20  
FGA  
FABP3  
RNPC3  
HDAC4  
PLA2G2A  
HDAC2  
CD209  
NFKBIA  
RUNX2  
NPM1  
EPX  
PIK3CG  
PLP1  
TYMP  
NAT2  
F9  
IGES  
ITGA5  
BRD4  
CADM1  
RPGRIP1L  
TFRC  
ATP13A2  
HOTAIR  
HPS6  
LGALS9  
HPS3  
CYP2C9  
F13A1  
FLT4  
HSPB1  
PRG2  
OSM  
DEFB1  
PPIG  
OMP  
LIPA  
TXN  
HRH1  
CXCR6  
DEFB103B  
TUBB  
MIR146B  
TGFA  
RAP1A  
ITGA1  
AKR1B1  
ABCB7  
HDAC8  
PRKCA  
KCNJ11  
HBG2  
PLA2G1B  
C5AR1  
PDPN

PARP1  
PDE4A  
CFLAR  
AK2  
CDC42  
PRSS2  
SPI1  
EGR1  
TNFSF14  
F2RL1  
VCAN  
GAS5  
ALPP  
MECOM  
FCN3  
LAMP3  
CLDN5  
CCL7  
NR1H2  
ADK  
RPS27A  
FBN2  
FURIN  
SOX9  
ADAMTSL1  
HMOX2  
IKBKB  
IL12RB2  
RPS6KB1  
CTSH  
SRXN1  
IGFBP2  
NOTCH3  
ETS1  
MKI67  
PLA2G4A  
NOX1  
CGB3  
B3GAT1  
CTSK  
GLRX  
HABP2  
GGT1  
ITLN1  
AGRN  
GRN  
ANXA2  
IL27  
CPS1  
STC1  
TNFRSF9  
NRP1  
IL16  
FGB  
RDX  
LGALS1  
DNASE1  
COL11A1

TNFRSF4  
F10  
MET  
FABP4  
PRDX1  
P2RY2  
TUG1  
MUTYH  
PTGES  
BPIFB1  
FLI1  
PLCG1  
SLC4A1  
GPRC5A  
KLK3  
CEBPB  
LEPROT  
CPQ  
SP1  
KIF1B  
MASP2  
PLOD1  
C1QA  
C1QC  
C1QB  
NR0B2  
PTCH2  
RAD54L  
NFIA  
DRC1  
NPHP1  
SEC61A1  
NPHP3  
CCDC39  
RNF168  
WDR19
