# Supplementary material for: Network Pharmacology Prediction and Molecular Docking-Based Strategy to Discover the Potential Pharmacological Mechanism of Wen-Yu-Jin against Pulmonary Fibrosis in a Mouse Model
Source: Hindawi journal article supplement (doi:10.1155/2022/7753508), 2022-02-10
Supplement: f1 [file 7753508.f1.zip]

**Supplementary Table S5**

The topological feature values of the key targets in Compound-Target-Pathway network

| Target   | nar      | Betweenness | Closeness | Degree |
|----------|----------|-------------|-----------|--------|
| STAT3    | 0.024531 | 0.972222    | 34        |        |
| SRC      | 0.022467 | 0.972222    | 34        |        |
| IL6      | 0.025059 | 0.972222    | 34        |        |
| MAPK1    | 0.018606 | 0.945946    | 33        |        |
| AKT1     | 0.015892 | 0.921053    | 32        |        |
| EGFR     | 0.014583 | 0.897436    | 31        |        |
| MAPK8    | 0.012962 | 0.897436    | 31        |        |
| MAPK14   | 0.011751 | 0.875       | 30        |        |
| IL1B     | 0.014353 | 0.853659    | 29        |        |
| MTOR     | 0.01329  | 0.853659    | 29        |        |
| PTGS2    | 0.006919 | 0.853659    | 29        |        |
| MMP9     | 0.010099 | 0.853659    | 29        |        |
| TLR4     | 0.012624 | 0.853659    | 29        |        |
| RELA     | 0.013874 | 0.853659    | 29        |        |
| HSP90AA1 | 0.01137  | 0.833333    | 28        |        |
| CCND1    | 0.007317 | 0.813953    | 27        |        |
| SIRT1    | 0.005228 | 0.795455    | 26        |        |
| MMP2     | 0.003474 | 0.795455    | 26        |        |
| ICAM1    | 0.009665 | 0.795455    | 26        |        |
| NOS3     | 0.005593 | 0.777778    | 25        |        |
| ESR1     | 0.003951 | 0.777778    | 25        |        |
| STAT6    | 0.006382 | 0.76087     | 24        |        |
| EP300    | 0.005668 | 0.744681    | 23        |        |
| TLR9     | 0.005974 | 0.744681    | 23        |        |
| KDR      | 0.003056 | 0.729167    | 22        |        |
| JAK1     | 0.010756 | 0.714286    | 21        |        |
| HMOX1    | 0.001264 | 0.7         | 20        |        |
| SERPINE1 | 0.001051 | 0.7         | 20        |        |
| MMP3     | 0.0036   | 0.7         | 20        |        |
| MDM2     | 0.001345 | 0.686275    | 19        |        |
| NOS2     | 0.000702 | 0.673077    | 18        |        |
| CREBBP   | 0.001858 | 0.660377    | 17        |        |
| PRKCD    | 0.001486 | 0.614035    | 13        |        |
| SYK      | 0.001672 | 0.614035    | 13        |        |
| PRKCA    | 0.002195 | 0.603448    | 12        |        |
| CCR5     | 0.000309 | 0.57377     | 9         |        |
