# Supplementary material for: Network Pharmacology Prediction and Molecular Docking-Based Strategy to Discover the Potential Pharmacological Mechanism of Wen-Yu-Jin against Pulmonary Fibrosis in a Mouse Model
Source: Hindawi journal article supplement (doi:10.1155/2022/7753508), 2022-02-10
Supplement: f1 [file 7753508.f1.zip]

**Supplementary Table S4** 48 key targets of WYJ against IPF

| Target name | Betweenness Centra | Closeness Centra | Degree |
|-------------|--------------------|------------------|--------|
| IL6         | 0.10215744         | 0.83108108       | 98     |
| AKT1        | 0.07180425         | 0.78343949       | 89     |
| EGFR        | 0.04777266         | 0.73214286       | 79     |
| MAPK1       | 0.03989939         | 0.71929825       | 76     |
| SRC         | 0.02898867         | 0.69886364       | 71     |
| STAT3       | 0.02623321         | 0.69101124       | 70     |
| PTGS2       | 0.03474508         | 0.69491525       | 70     |
| MAPK8       | 0.02093088         | 0.68715084       | 69     |
| IL1B        | 0.03114078         | 0.68715084       | 68     |
| MMP9        | 0.03146996         | 0.66486486       | 64     |
| TLR4        | 0.01993166         | 0.65079365       | 59     |
| HSP90AA1    | 0.01920591         | 0.6373057        | 56     |
| MMP2        | 0.01241093         | 0.63076923       | 54     |
| CCND1       | 0.0114142          | 0.63076923       | 53     |
| MAPK14      | 0.00750973         | 0.63076923       | 53     |
| MTOR        | 0.0109869          | 0.62755102       | 53     |
| NOS3        | 0.01997073         | 0.63402062       | 52     |
| PPARG       | 0.0343203          | 0.63076923       | 51     |
| ICAM1       | 0.01247068         | 0.62755102       | 51     |
| ESR1        | 0.00739533         | 0.615            | 49     |
| SIRT1       | 0.01497138         | 0.615            | 47     |
| RELA        | 0.0052015          | 0.60294118       | 45     |
| PTPRC       | 0.00881161         | 0.6              | 44     |
| MPO         | 0.015004           | 0.59708738       | 42     |
| KDR         | 0.00423423         | 0.58571429       | 41     |
| ACE         | 0.01306016         | 0.59708738       | 41     |
| EP300       | 0.00932664         | 0.59134615       | 40     |
| SERPINE1    | 0.00577073         | 0.58851675       | 40     |
| APP         | 0.00888037         | 0.58293839       | 37     |
| HMOX1       | 0.00949351         | 0.57746479       | 36     |
| REN         | 0.0088579          | 0.58293839       | 36     |
| STAT6       | 0.00237573         | 0.57209302       | 35     |
| MDM2        | 0.00312134         | 0.57209302       | 34     |
| AR          | 0.00273555         | 0.57209302       | 34     |
| TLR9        | 0.0026224          | 0.56422018       | 33     |
| JAK1        | 0.00216645         | 0.55656109       | 32     |
| MMP1        | 0.00270628         | 0.56682028       | 32     |
| MMP3        | 0.00226773         | 0.55909091       | 31     |
| F2          | 0.00773739         | 0.56682028       | 31     |
| NOS2        | 0.00305134         | 0.56422018       | 30     |
| CREBBP      | 0.00350145         | 0.55656109       | 30     |
| AGTR1       | 0.00417234         | 0.56164384       | 29     |
| PRKCA       | 0.00628084         | 0.55405405       | 28     |
| NR3C1       | 0.00782177         | 0.55405405       | 27     |
| PRKCD       | 0.00372331         | 0.53947368       | 25     |
| SYK         | 0.00282708         | 0.5371179        | 25     |
| ALOX5       | 0.00350515         | 0.54424779       | 24     |
| CCR5        | 0.00367484         | 0.5371179        | 23     |
