# Supplementary material for: Network Pharmacology Prediction and Molecular Docking-Based Strategy to Discover the Potential Pharmacological Mechanism of Wen-Yu-Jin against Pulmonary Fibrosis in a Mouse Model
Source: Hindawi journal article supplement (doi:10.1155/2022/7753508), 2022-02-10
Supplement: f1 [file 7753508.f1.zip]

**Supplementary Table S3**

124 potential targets for WJY treatment on IPF

ABCB1  
ABL1  
ACE  
ADAM17  
ADRB2  
ADRB3  
AGTR1  
AKR1B1  
AKT1  
ALOX5  
APP  
AR  
ATP12A  
ATP4A  
BRAF  
BRD4  
C5AR1  
CASR  
CCND1  
CCR4  
CCR5  
CD81  
CMA1  
CREBBP  
CRHR1  
CTSB  
CTSD  
CTSG  
CTSH  
CTSK  
CTSL  
CYP19A1  
CYP2C9  
DHFR  
DPP4  
EDNRA  
EGFR  
EP300  
EPHX1  
ESR1  
F2  
F3  
FABP3  
FABP4  
FGFR1  
G6PD  
GSTP1  
HDAC8  
HMGCR  
HMOX1  
HRH1  
HRH2  
HSP90AA1  
ICAM1  
IDO1  
IGF1R

IKBKB  
IKBKG  
IL1B  
IL6  
ITGAL  
ITGB2  
JAK1  
JAK3  
KCNJ11  
KDR  
LIPA  
MAPK1  
MAPK14  
MAPK8  
MCL1  
MDM2  
MET  
MIF  
MME  
MMP1  
MMP13  
MMP2  
MMP3  
MMP8  
MMP9  
MPO  
MTOR  
MYLK  
NAMPT  
NFE2L2  
NLRP3  
NOS1  
NOS2  
NOS3  
NR3C1  
PARP1  
PDGFRB  
PGR  
PLA2G1B  
PLA2G2A  
PLA2G6  
PLCG1  
PPARA  
PPARG  
PRKCA  
PRKCD  
PTGES  
PTGS1  
PTGS2  
PTPN11  
PTPRC  
RASGRP1  
RELA  
REN  
RET  
RPS6KB1  
SERPINE1  
SIRT1

SRC  
STAT3  
STAT6  
SYK  
TACR1  
TERT  
TGFB1  
TLR4  
TLR9  
TYK2
