# Supplementary material for: Network Pharmacology Prediction and Molecular Docking-Based Strategy to Discover the Potential Pharmacological Mechanism of Wen-Yu-Jin against Pulmonary Fibrosis in a Mouse Model
Source: Hindawi journal article supplement (doi:10.1155/2022/7753508), 2022-02-10
Supplement: f1 [file 7753508.f1.zip]

**Supplementary Table S1** WYJ-related targets

| Ingredient of WYJ          | Target   | 436 WYJ-related targets |
|----------------------------|----------|-------------------------|
| (Z)-p-Methoxycinnamic acid | CHRN2    | CHRN2                   |
| (Z)-p-Methoxycinnamic acid | CHRNA4   | CHRNA4                  |
| (Z)-p-Methoxycinnamic acid | ITGB2    | ITGB2                   |
| (Z)-p-Methoxycinnamic acid | ICAM1    | ICAM1                   |
| (Z)-p-Methoxycinnamic acid | ITGAL    | ITGAL                   |
| (Z)-p-Methoxycinnamic acid | TAS1R3   | TAS1R3                  |
| (Z)-p-Methoxycinnamic acid | TAS1R1   | TAS1R1                  |
| (Z)-p-Methoxycinnamic acid | AKR1B1   | AKR1B1                  |
| (Z)-p-Methoxycinnamic acid | CA2      | CA2                     |
| (Z)-p-Methoxycinnamic acid | CA7      | CA7                     |
| (Z)-p-Methoxycinnamic acid | CA1      | CA1                     |
| (Z)-p-Methoxycinnamic acid | CA12     | CA12                    |
| (Z)-p-Methoxycinnamic acid | CA14     | CA14                    |
| (Z)-p-Methoxycinnamic acid | CA9      | CA9                     |
| (Z)-p-Methoxycinnamic acid | CA4      | CA4                     |
| (Z)-p-Methoxycinnamic acid | SLC16A1  | SLC16A1                 |
| (Z)-p-Methoxycinnamic acid | CA5A     | CA5A                    |
| (Z)-p-Methoxycinnamic acid | CA3      | CA3                     |
| (Z)-p-Methoxycinnamic acid | CA5B     | CA5B                    |
| (Z)-p-Methoxycinnamic acid | TLR4     | TLR4                    |
| (Z)-p-Methoxycinnamic acid | ESR2     | ESR2                    |
| (Z)-p-Methoxycinnamic acid | MMP1     | MMP1                    |
| (Z)-p-Methoxycinnamic acid | HCAR2    | HCAR2                   |
| (Z)-p-Methoxycinnamic acid | CA6      | CA6                     |
| (Z)-p-Methoxycinnamic acid | ALOX5    | ALOX5                   |
| (Z)-p-Methoxycinnamic acid | MAOB     | MAOB                    |
| (Z)-p-Methoxycinnamic acid | F3       | F3                      |
| (Z)-p-Methoxycinnamic acid | PAM      | PAM                     |
| (Z)-p-Methoxycinnamic acid | AKR1B10  | AKR1B10                 |
| (Z)-p-Methoxycinnamic acid | KDM4E    | KDM4E                   |
| (Z)-p-Methoxycinnamic acid | KDM3A    | KDM3A                   |
| (Z)-p-Methoxycinnamic acid | KDM2A    | KDM2A                   |
| (Z)-p-Methoxycinnamic acid | KDM5C    | KDM5C                   |
| (Z)-p-Methoxycinnamic acid | KDM4A    | KDM4A                   |
| (Z)-p-Methoxycinnamic acid | KDM4C    | KDM4C                   |
| (Z)-p-Methoxycinnamic acid | KMO      | KMO                     |
| (Z)-p-Methoxycinnamic acid | RELA     | RELA                    |
| (Z)-p-Methoxycinnamic acid | APEX1    | APEX1                   |
| (Z)-p-Methoxycinnamic acid | NOTUM    | NOTUM                   |
| (Z)-p-Methoxycinnamic acid | MMP2     | MMP2                    |
| (Z)-p-Methoxycinnamic acid | CA13     | CA13                    |
| (Z)-p-Methoxycinnamic acid | EGLN3    | EGLN3                   |
| (Z)-p-Methoxycinnamic acid | PTGDR2   | PTGDR2                  |
| (Z)-p-Methoxycinnamic acid | PTPN1    | PTPN1                   |
| (Z)-p-Methoxycinnamic acid | PTGS2    | PTGS2                   |
| (Z)-p-Methoxycinnamic acid | MMP8     | MMP8                    |
| (Z)-p-Methoxycinnamic acid | SLC22A12 | SLC22A12                |
| (Z)-p-Methoxycinnamic acid | FOLH1    | FOLH1                   |
| (Z)-p-Methoxycinnamic acid | CPA3     | CPA3                    |
| (Z)-p-Methoxycinnamic acid | GRK2     | GRK2                    |
| (Z)-p-Methoxycinnamic acid | MAPK10   | MAPK10                  |
| (Z)-p-Methoxycinnamic acid | MMP9     | MMP9                    |
| (Z)-p-Methoxycinnamic acid | APP      | APP                     |
| (Z)-p-Methoxycinnamic acid | KDM4B    | KDM4B                   |
| (Z)-p-Methoxycinnamic acid | KDM5B    | KDM5B                   |

|                            |         |         |
|----------------------------|---------|---------|
| (Z)-p-Methoxycinnamic acid | MIF     | MIF     |
| (Z)-p-Methoxycinnamic acid | ACE     | ACE     |
| (Z)-p-Methoxycinnamic acid | SLC16A3 | SLC16A3 |
| (Z)-p-Methoxycinnamic acid | PTPRC   | PTPRC   |
| (Z)-p-Methoxycinnamic acid | EDNRB   | EDNRB   |
| (Z)-p-Methoxycinnamic acid | REN     | REN     |
| (Z)-p-Methoxycinnamic acid | PTGER4  | PTGER4  |
| (Z)-p-Methoxycinnamic acid | GSTA1   | GSTA1   |
| (Z)-p-Methoxycinnamic acid | GSTP1   | GSTP1   |
| (Z)-p-Methoxycinnamic acid | NQO2    | NQO2    |
| (Z)-p-Methoxycinnamic acid | GSK3B   | GSK3B   |
| (Z)-p-Methoxycinnamic acid | BACE1   | BACE1   |
| (Z)-p-Methoxycinnamic acid | CPB2    | CPB2    |
| (Z)-p-Methoxycinnamic acid | CPN1    | CPN1    |
| 1,2-Dihydrocurcumin        | ALOX5   | HTR1A   |
| 1,2-Dihydrocurcumin        | HTR1A   | NFE2L2  |
| 1,2-Dihydrocurcumin        | NFE2L2  | EGFR    |
| 1,2-Dihydrocurcumin        | EGFR    | PTGS1   |
| 1,2-Dihydrocurcumin        | CA2     | ALOX15  |
| 1,2-Dihydrocurcumin        | PTGS1   | PRKCE   |
| 1,2-Dihydrocurcumin        | CA7     | EP300   |
| 1,2-Dihydrocurcumin        | APP     | HSD11B1 |
| 1,2-Dihydrocurcumin        | CA1     | NOS2    |
| 1,2-Dihydrocurcumin        | ALOX15  | PTGES   |
| 1,2-Dihydrocurcumin        | CA6     | TLR9    |
| 1,2-Dihydrocurcumin        | MMP9    | RAF1    |
| 1,2-Dihydrocurcumin        | CA12    | BRAF    |
| 1,2-Dihydrocurcumin        | PRKCE   | MET     |
| 1,2-Dihydrocurcumin        | CA9     | SYK     |
| 1,2-Dihydrocurcumin        | CA4     | GCGR    |
| 1,2-Dihydrocurcumin        | EP300   | WEE1    |
| 1,2-Dihydrocurcumin        | CA13    | CHEK2   |
| 1,2-Dihydrocurcumin        | CA5B    | AURKB   |
| 1,2-Dihydrocurcumin        | F3      | RPS6KB1 |
| 1,2-Dihydrocurcumin        | HSD11B1 | AURKA   |
| 1,2-Dihydrocurcumin        | NOS2    | ABCB1   |
| 1,2-Dihydrocurcumin        | BACE1   | ABCC1   |
| 1,2-Dihydrocurcumin        | PTGES   | PDK1    |
| 1,2-Dihydrocurcumin        | TLR4    | CHEK1   |
| 1,2-Dihydrocurcumin        | TLR9    | PARP1   |
| 1,2-Dihydrocurcumin        | RAF1    | PIK3CD  |
| 1,2-Dihydrocurcumin        | BRAF    | ALDH2   |
| 1,2-Dihydrocurcumin        | MET     | CDK1    |
| 1,2-Dihydrocurcumin        | SYK     | HSD17B2 |
| 1,2-Dihydrocurcumin        | GCGR    | DNM1    |
| 1,2-Dihydrocurcumin        | GSK3B   | CAMK2A  |
| 1,2-Dihydrocurcumin        | WEE1    | AKT2    |
| 1,2-Dihydrocurcumin        | CHEK2   | MELK    |
| 1,2-Dihydrocurcumin        | AURKB   | P2RY12  |
| 1,2-Dihydrocurcumin        | RPS6KB1 | AGTR1   |
| 1,2-Dihydrocurcumin        | AURKA   | ALOX5AP |
| 1,2-Dihydrocurcumin        | ABCB1   | PIK3CA  |
| 1,2-Dihydrocurcumin        | ABCC1   | DRD3    |
| 1,2-Dihydrocurcumin        | PDK1    | HDAC8   |
| 1,2-Dihydrocurcumin        | CHEK1   | CCNE1   |
| 1,2-Dihydrocurcumin        | PARP1   | CDK2    |
| 1,2-Dihydrocurcumin        | PIK3CD  | CCNE2   |
| 1,2-Dihydrocurcumin        | ALDH2   | GABRB3  |

|                     |         |         |
|---------------------|---------|---------|
| 1,2-Dihydrocurcumin | CDK1    | GABRA3  |
| 1,2-Dihydrocurcumin | HSD17B2 | GABRG2  |
| 1,2-Dihydrocurcumin | DNM1    | GABRA1  |
| 1,2-Dihydrocurcumin | CAMK2A  | GABRB2  |
| 1,2-Dihydrocurcumin | AKT2    | GABRA2  |
| 1,2-Dihydrocurcumin | MELK    | GABRA6  |
| 1,2-Dihydrocurcumin | P2RY12  | GABRA5  |
| 1,2-Dihydrocurcumin | AGTR1   | PSEN2   |
| 1,2-Dihydrocurcumin | ALOX5AP | PSENEN  |
| 1,2-Dihydrocurcumin | PIK3CA  | NCSTN   |
| 1,2-Dihydrocurcumin | DRD3    | APH1A   |
| 1,2-Dihydrocurcumin | HDAC8   | PSEN1   |
| ar-turmerone        | CCNE1   | APH1B   |
| ar-turmerone        | CDK2    | MGLL    |
| ar-turmerone        | CCNE2   | DRD2    |
| ar-turmerone        | GABRB3  | DRD4    |
| ar-turmerone        | GABRA3  | SRD5A1  |
| ar-turmerone        | GABRG2  | CHRM1   |
| ar-turmerone        | GABRA1  | GRM1    |
| ar-turmerone        | GABRB2  | HTR2C   |
| ar-turmerone        | GABRG2  | PREP    |
| ar-turmerone        | GABRA2  | P2RX7   |
| ar-turmerone        | GABRG2  | CYP19A1 |
| ar-turmerone        | GABRB3  | OPRL1   |
| ar-turmerone        | GABRB3  | HCRT2   |
| ar-turmerone        | GABRG2  | CACNA1B |
| ar-turmerone        | GABRA6  | GRM5    |
| ar-turmerone        | GABRB3  | EPHX2   |
| ar-turmerone        | GABRB3  | MPO     |
| ar-turmerone        | GABRG2  | C5AR1   |
| ar-turmerone        | GABRG2  | AKR1C3  |
| ar-turmerone        | GABRA1  | HCRT1   |
| ar-turmerone        | GABRA5  | MTNR1A  |
| ar-turmerone        | PSEN2   | MTNR1B  |
| ar-turmerone        | PSENEN  | KCNN4   |
| ar-turmerone        | NCSTN   | KCNA3   |
| ar-turmerone        | APH1A   | MC4R    |
| ar-turmerone        | PSEN1   | EPHX1   |
| ar-turmerone        | APH1B   | LTA4H   |
| ar-turmerone        | MGLL    | TGFBR1  |
| ar-turmerone        | DRD2    | FCGR1A  |
| ar-turmerone        | DRD4    | CRHR1   |
| ar-turmerone        | SRD5A1  | CHRM4   |
| ar-turmerone        | CHRM1   | HTR2B   |
| ar-turmerone        | GRM1    | ADRA2A  |
| ar-turmerone        | HTR2C   | HTR1B   |
| ar-turmerone        | PREP    | ADRA2C  |
| ar-turmerone        | P2RX7   | HRH2    |
| ar-turmerone        | CYP19A1 | ADRA2B  |
| ar-turmerone        | OPRL1   | HTR1D   |
| ar-turmerone        | HCRT2   | CHRM5   |
| ar-turmerone        | CACNA1B | DRD1    |
| ar-turmerone        | GRM5    | CHRM2   |
| ar-turmerone        | EPHX2   | ADRA1D  |
| ar-turmerone        | MPO     | ADRA1A  |
| ar-turmerone        | C5AR1   | HRH1    |
| ar-turmerone        | AKR1C3  | CHRM3   |
| ar-turmerone        | HCRT1   | HTR6    |

|                      |         |          |
|----------------------|---------|----------|
| ar-turmerone         | MTNR1A  | TACR3    |
| ar-turmerone         | MTNR1B  | PIK3CB   |
| ar-turmerone         | HSD17B2 | TSPO     |
| ar-turmerone         | KCNN4   | DNMT3A   |
| ar-turmerone         | KCNA3   | SIRT2    |
| ar-turmerone         | MC4R    | BRD4     |
| ar-turmerone         | EPHX1   | PABPC1   |
| ar-turmerone         | LTA4H   | PDE4B    |
| ar-turmerone         | PTGDR2  | ADH1A    |
| ar-turmerone         | TGFB1   | TDO2     |
| ar-turmerone         | FCGR1A  | STAT3    |
| ar-turmerone         | CRHR1   | CDK5     |
| ar-turmerone         | CHRM4   | CDK5R1   |
| ar-turmerone         | HTR2B   | HDAC3    |
| ar-turmerone         | ADRA2A  | NCOR2    |
| ar-turmerone         | HTR1B   | CHUK     |
| ar-turmerone         | ADRA2C  | IKBKB    |
| ar-turmerone         | HRH2    | IKBKG    |
| ar-turmerone         | ADRA2B  | MAOA     |
| ar-turmerone         | HTR1D   | TOP2A    |
| ar-turmerone         | CHRM5   | GLO1     |
| ar-turmerone         | DRD1    | SRC      |
| ar-turmerone         | CHRM2   | PLCG1    |
| ar-turmerone         | ADRA1D  | EEF2K    |
| ar-turmerone         | ADRA1A  | SERPINE1 |
| ar-turmerone         | HRH1    | MTOR     |
| ar-turmerone         | DRD3    | HSD17B1  |
| ar-turmerone         | CHRM3   | MMP13    |
| ar-turmerone         | HTR6    | CTSL     |
| ar-turmerone         | TACR3   | ABL1     |
| ar-turmerone         | PIK3CB  | PDGFRB   |
| ar-turmerone         | PIK3CA  | FLT3     |
| ar-turmerone         | TSPO    | TOP1     |
| ar-turmerone         | DNMT3A  | HSP90AA1 |
| ar-turmerone         | SIRT2   | ROCK2    |
| ar-turmerone         | BRD4    | MCL1     |
| ar-turmerone         | PABPC1  | GLI2     |
| ar-turmerone         | PDE4B   | GLI1     |
| ar-turmerone         | ADH1A   | PLK1     |
| ar-turmerone         | GABRA5  | ESR1     |
| ar-turmerone         | TDO2    | HDAC7    |
| ar-turmerone         | STAT3   | CFD      |
| bisdemethoxycurcumin | CDK5    | ALPL     |
| bisdemethoxycurcumin | CDK5R1  | STAT6    |
| bisdemethoxycurcumin | HDAC3   | PIM1     |
| bisdemethoxycurcumin | NCOR2   | BMP1     |
| bisdemethoxycurcumin | CHUK    | CLK3     |
| bisdemethoxycurcumin | IKBKB   | ADH4     |
| bisdemethoxycurcumin | IKBKG   | ADH1B    |
| bisdemethoxycurcumin | BACE1   | ADH1C    |
| bisdemethoxycurcumin | MAOA    | TYR      |
| bisdemethoxycurcumin | APP     | CES1     |
| bisdemethoxycurcumin | EP300   | CES2     |
| bisdemethoxycurcumin | PTGES   | ALDH1A1  |
| bisdemethoxycurcumin | TLR9    | PIK3R1   |
| bisdemethoxycurcumin | F3      | F2       |
| bisdemethoxycurcumin | HSD11B1 | PRSS1    |
| bisdemethoxycurcumin | TOP2A   | CTRC     |

|                      |          |         |
|----------------------|----------|---------|
| bisdemethoxycurcumin | GLO1     | CYP17A1 |
| bisdemethoxycurcumin | SRC      | CTSK    |
| bisdemethoxycurcumin | PLCG1    | CTSB    |
| bisdemethoxycurcumin | EEF2K    | CTSH    |
| bisdemethoxycurcumin | ALOX5    | SLC6A4  |
| bisdemethoxycurcumin | AURKA    | POLB    |
| bisdemethoxycurcumin | SERPINE1 | TAAR1   |
| bisdemethoxycurcumin | CA7      | SLC6A3  |
| bisdemethoxycurcumin | CA1      | PLA2G6  |
| bisdemethoxycurcumin | CA6      | AR      |
| bisdemethoxycurcumin | CA14     | PGR     |
| bisdemethoxycurcumin | CA9      | KCNH2   |
| bisdemethoxycurcumin | CA4      | QPCT    |
| bisdemethoxycurcumin | CA5B     | FAAH    |
| bisdemethoxycurcumin | CA5A     | BCHE    |
| bisdemethoxycurcumin | MTOR     | LIPE    |
| bisdemethoxycurcumin | HSD17B2  | PDE10A  |
| bisdemethoxycurcumin | HSD17B1  | CCR4    |
| bisdemethoxycurcumin | GSK3B    | KCNMA1  |
| bisdemethoxycurcumin | CDK1     | CYP11B1 |
| bisdemethoxycurcumin | EGFR     | CYP11B2 |
| bisdemethoxycurcumin | MMP13    | NOS1    |
| bisdemethoxycurcumin | MMP8     | NOS3    |
| bisdemethoxycurcumin | NFE2L2   | NR1I2   |
| bisdemethoxycurcumin | PTGS1    | IDH1    |
| bisdemethoxycurcumin | CTSL     | HRH3    |
| bisdemethoxycurcumin | DNM1     | HRH4    |
| bisdemethoxycurcumin | RAF1     | TRPA1   |
| bisdemethoxycurcumin | BRAF     | FNTB    |
| bisdemethoxycurcumin | ABL1     | FNTA    |
| bisdemethoxycurcumin | PDGFRB   | ATP12A  |
| bisdemethoxycurcumin | FLT3     | PPARG   |
| bisdemethoxycurcumin | TOP1     | CDC25C  |
| bisdemethoxycurcumin | AGTR1    | CDC25A  |
| bisdemethoxycurcumin | MET      | CDC25B  |
| bisdemethoxycurcumin | AURKB    | PPARA   |
| bisdemethoxycurcumin | RPS6KB1  | PPARD   |
| bisdemethoxycurcumin | PDK1     | NR3C2   |
| bisdemethoxycurcumin | HSP90AA1 | TAS2R31 |
| bisdemethoxycurcumin | ROCK2    | RPS6KA5 |
| bisdemethoxycurcumin | MCL1     | PRKCA   |
| bisdemethoxycurcumin | GLI2     | HDAC6   |
| bisdemethoxycurcumin | GLI1     | HTR2A   |
| bisdemethoxycurcumin | PLK1     | CTSS    |
| bisdemethoxycurcumin | CHEK1    | TTL     |
| bisdemethoxycurcumin | WEE1     | HMGCR   |
| bisdemethoxycurcumin | ESR1     | GRK6    |
| bisdemethoxycurcumin | CHEK2    | HSD17B3 |
| bisdemethoxycurcumin | HDAC7    | PSMB5   |
| bisdemethoxycurcumin | CFD      | PPP2CA  |
| bisdemethoxycurcumin | ABCC1    | PARP2   |
| bisdemethoxycurcumin | AKR1B1   | SHBG    |
| bisdemethoxycurcumin | ALPL     | CAPN1   |
| bisdemethoxycurcumin | STAT6    | HSD11B2 |
| bisdemethoxycurcumin | PIM1     | HMOX1   |
| bisdemethoxycurcumin | BMP1     | GPR139  |
| bisdemethoxycurcumin | CLK3     | F2R     |
| cuminal              | ADH4     | PARP3   |

|               |         |          |
|---------------|---------|----------|
| cuminal       | ADH1B   | PARP4    |
| cuminal       | ADH1C   | TNKS     |
| cuminal       | TYR     | NR1I3    |
| cuminal       | CES1    | MAP2K1   |
| cuminal       | CES2    | DPP4     |
| cuminal       | ALDH1A1 | RIPK1    |
| cuminal       | GSK3B   | IL1B     |
| cuminal       | SRD5A1  | CDC7     |
| Curcumlactone | GABRA2  | MAPKAPK2 |
| Curcumlactone | GABRB2  | MMP3     |
| Curcumlactone | GABRG2  | GSK3A    |
| Curcumlactone | PIK3CD  | PDCD4    |
| Curcumlactone | PIK3R1  | ECE1     |
| Curcumlactone | F2      | MAPK14   |
| Curcumlactone | PRSS1   | CYP1A2   |
| Curcumlactone | PTGS2   | MME      |
| Curcumlactone | CTRC    | PDE7A    |
| Curcumlactone | HSD11B1 | FAP      |
| Curcumlactone | CYP19A1 | PTAFR    |
| Curcumlactone | CYP17A1 | SCN2A    |
| Curcumlactone | PREP    | SCN10A   |
| Curcumlactone | CTSK    | RPS6KA3  |
| Curcumlactone | CTSL    | IARS     |
| Curcumlactone | CTSB    | PTPN11   |
| Curcumlactone | CTSH    | JAK2     |
| Curcumlactone | PTPN1   | ADAM17   |
| Curcumlactone | EPHX1   | CSF1R    |
| Curcumlactone | ADRA2A  | DHODH    |
| Curcumlactone | ADRA2C  | SIRT1    |
| Curcumlactone | ADRA2B  | CDK4     |
| Curcumlactone | SLC6A4  | DBF4     |
| Curcumlactone | POLB    | CCND1    |
| Curcumlactone | TAAR1   | GABRA4   |
| Curcumlactone | HTR1A   | PLA2G1B  |
| Curcumlactone | SLC6A3  | CCR5     |
| Curcumlactone | PLA2G6  | ABCG2    |
| Curcumlactone | ALDH2   | SRD5A2   |
| Curcumlactone | ADRA1A  | TACR1    |
| Curcumlactone | AR      | CMA1     |
| Curcumlactone | PGR     | CTSG     |
| Curcumlactone | KCNH2   | IGF1R    |
| Curcumlactone | NOS2    | HLCS     |
| Curcumlactone | QPCT    | LRRK2    |
| Curcumlactone | FAAH    | DYRK1A   |
| Curcumlactone | BCHE    | NLRP3    |
| Curcumlactone | LIPE    | MDM2     |
| Curcumlactone | ABCC1   | CTSC     |
| Curcumlactone | TOP2A   | CTSF     |
| Curcumlactone | PDE10A  | CTSV     |
| Curcumlactone | GRM5    | KCNA5    |
| Curcumlactone | PTGES   | CTSD     |
| Curcumlactone | CCR4    | TNKS2    |
| Curcumlactone | KCNMA1  | CHRNA4   |
| Curcumlactone | CYP11B1 | CHRNA3   |
| Curcumlactone | CYP11B2 | PRKCG    |
| Curcumlactone | P2RX7   | PRKCD    |
| Curcumlactone | NOS1    | JAK1     |
| Curcumlactone | NOS3    | PER2     |

|                    |         |          |
|--------------------|---------|----------|
| Curcumalactone     | NR1I2   | THRB     |
| Curcumalactone     | IDH1    | EDNRA    |
| Curcumalactone     | HRH3    | PRKCB    |
| Curcumalactone     | HRH4    | PRKCQ    |
| Curcumalactone     | CHRNA4  | CYP2C9   |
| Curcumalactone     | GSK3B   | JAK3     |
| Curcumalactone     | TRPA1   | TYK2     |
| Curcumalactone     | TGFBR1  | SLC6A2   |
| Curcumenolactone A | FNTB    | RASGRP1  |
| Curcumenolactone A | FNTA    | IL6ST    |
| Curcumenolactone A | GABRA1  | MAPK8    |
| Curcumenolactone A | GABRB2  | CEL      |
| Curcumenolactone A | GABRG2  | KDR      |
| Curcumenolactone A | PSEN2   | KIF11    |
| Curcumenolactone A | PSENEN  | ABCC9    |
| Curcumenolactone A | NCSTN   | KCNJ11   |
| Curcumenolactone A | APH1A   | NR3C1    |
| Curcumenolactone A | PSEN1   | AOC3     |
| Curcumenolactone A | APH1B   | BRD2     |
| Curcumenolactone A | CYP19A1 | SERPINA6 |
| Curcumenolactone A | AR      | FABP1    |
| Curcumenolactone A | PTPN1   | FKBP1A   |
| Curcumenolactone A | PGR     | GPBAR1   |
| Curcumenolactone A | ATP12A  | GLUL     |
| Curcumenolactone A | PPARG   | KAT2B    |
| Curcumenolactone A | CDC25C  | IDO1     |
| Curcumenolactone A | CDC25A  | IL6      |
| Curcumenolactone A | CDC25B  | LIPA     |
| Curcumenolactone A | HSD11B1 | MPEG1    |
| Curcumenolactone A | PPARA   | NPC1L1   |
| Curcumenolactone A | PPARD   | RORA     |
| Curcumenolactone A | NR3C2   | FDFT1    |
| Curcumenolactone A | ESR1    | TRPM8    |
| Curcumenolactone A | ESR2    | ATP4A    |
| Curcumenolactone A | TAS2R31 | ATP4B    |
| Curcumenolactone A | P2RX7   | CCNB1    |
| Curcumenolactone A | RPS6KA5 | CCNA2    |
| Curcumenolactone A | MTNR1A  | CCNA1    |
| Curcumenolactone A | MTNR1B  | DRD5     |
| Curcumenolactone A | CYP17A1 | AKT1     |
| Curcumenolactone A | CTSK    | PRKCZ    |
| Curcumenolactone A | NQO2    | FGFR1    |
| Curcumenolactone A | PRKCA   | ECE2     |
| Curcumenolactone A | HDAC6   | HTR3A    |
| Curcumenolactone A | PARP1   | MYLK     |
| Curcumenolactone A | HSD17B2 | CASR     |
| Curcumenolactone A | HTR2A   | EGLN1    |
| Curcumenolactone A | CTSS    | RET      |
| Curcumenolactone A | CTSB    | RIPK2    |
| Curcumenolactone A | TTL     | P2RX3    |
| Curcumenolactone A | BRD4    | PDE2A    |
| Curcumenolactone A | PTGS2   | PIM3     |
| Curcumenolactone A | HMGCR   | CSNK1G1  |
| Curcumenolactone A | MAOB    | CSNK1A1  |
| Curcumenolactone A | GRK6    | CSNK1D   |
| Curcumenolactone A | PTGS1   | FPR1     |
| Curcumenolactone A | CACNA1B | CLK2     |
| Curcumenolactone A | HSD17B3 | CALM1    |



|                    |          |         |
|--------------------|----------|---------|
| Curcumenolactone A | PSMB5    | TERT    |
| Curcumenolactone A | PPP2CA   | MAPK1   |
| Curcumenolactone A | MPO      | NR1D1   |
| Curcumenolactone A | PARP2    | DHFR    |
| Curcumenolactone A | SHBG     | NPY5R   |
| Curcumenolactone A | CAPN1    | PLA2G2A |
| Curcumenolactone A | EPHX1    | PHLPP2  |
| Curcumenolactone A | HSD11B2  | PDPK1   |
| Curcumenolactone A | HTR2C    | MPI     |
| Curcumenolactone A | F2       | BACE2   |
| Curcumenolactone A | PRSS1    | PDE5A   |
| Curcumenolactone A | HMOX1    | MAPK9   |
| Curcumenolactone A | GPR139   | CNR1    |
| Curcumenolactone A | CTSL     | NAMPT   |
| Curcumenolactone A | F2R      | TRPC6   |
| Curcumenolactone A | PARP3    | SIGMAR1 |
| Curcumenolactone A | PARP4    | FABP4   |
| Curcumenolactone A | TNKS     | FABP3   |
| Curcumenolactone A | NR1I3    | FABP5   |
| Curcumenolactone A | MAOA     | CD81    |
| Curcumenolactone A | MAP2K1   | NR1H4   |
| Curcumenolactone A | DPP4     | CYP51A1 |
| Curcumenolactone A | RIPK1    | NR1H3   |
| Curcumenolactone A | IL1B     | PTPRF   |
| Curcumenolactone A | CA2      | PTPN2   |
| Curcumenolactone A | CDC7     | ACP1    |
| Curcumenolactone A | MAPKAPK2 | G6PD    |
| Curcumenolactone A | MMP3     | SCD     |
| Curcumenolactone A | GSK3A    | CREBBP  |
| Curcumenolactone A | MMP9     | ADRB2   |
| Curcumenolactone A | MMP1     | ADRB1   |
| Curcumenolactone A | PDCD4    | ADRB3   |
| Curcumenolactone A | GABRA1   | PRKDC   |
| Curcumenolactone A | ECE1     |         |
| Curcumenolactone A | GABRA5   |         |
| Curcumenolactone A | MAPK14   |         |
| Curcumenolactone A | CYP1A2   |         |
| Curcumenolactone A | TSPO     |         |
| Curcumenolactone A | MME      |         |
| Curcumenolactone A | PDE7A    |         |
| Curcumenolactone A | FAP      |         |
| Curcumenolactone A | HRH1     |         |
| Curcumenolactone A | PTAFR    |         |
| Curcumenolactone A | SCN2A    |         |
| Curcumenolactone A | SCN10A   |         |
| Curcumenolactone A | RPS6KA3  |         |
| Curcumenolactone A | HTR2B    |         |
| Curcumenolactone A | HDAC8    |         |
| Curcumenolactone A | CYP11B1  |         |
| Curcumenolactone A | IARS     |         |
| Curcumenolactone A | PTPN11   |         |
| Curcumenolactone A | CYP11B2  |         |
| Curcumenolactone A | JAK2     |         |
| Curcumenolactone A | ADAM17   |         |
| Curcumenolactone A | CSF1R    |         |
| Curcumenolactone A | DHODH    |         |
| Curcumenolactone A | KCNN4    |         |
| Curcumenolactone A | SIRT1    |         |



|                    |         |
|--------------------|---------|
| Curcumenolactone B | CDC7    |
| Curcumenolactone B | CDK4    |
| Curcumenolactone B | DBF4    |
| Curcumenolactone B | CCND1   |
| Curcumenolactone B | FNTB    |
| Curcumenolactone B | FNTA    |
| Curcumenolactone B | GABRB3  |
| Curcumenolactone B | GABRA4  |
| Curcumenolactone B | GABRG2  |
| Curcumenolactone B | GABRB3  |
| Curcumenolactone B | GABRG2  |
| Curcumenolactone B | GABRA5  |
| Curcumenolactone B | PSEN2   |
| Curcumenolactone B | PSENEN  |
| Curcumenolactone B | NCSTN   |
| Curcumenolactone B | APH1A   |
| Curcumenolactone B | PSEN1   |
| Curcumenolactone B | APH1B   |
| Curcumenolactone B | CYP19A1 |
| Curcumenolactone B | AR      |
| Curcumenolactone B | PGR     |
| Curcumenolactone B | PTPN1   |
| Curcumenolactone B | ATP12A  |
| Curcumenolactone B | PPARG   |
| Curcumenolactone B | CDC25B  |
| Curcumenolactone B | CDC25C  |
| Curcumenolactone B | NR3C2   |
| Curcumenolactone B | CDC25A  |
| Curcumenolactone B | PPARA   |
| Curcumenolactone B | PPARD   |
| Curcumenolactone B | HSD11B1 |
| Curcumenolactone B | ESR1    |
| Curcumenolactone B | ESR2    |
| Curcumenolactone B | TAS2R31 |
| Curcumenolactone B | CYP17A1 |
| Curcumenolactone B | P2RX7   |
| Curcumenolactone B | MTNR1A  |
| Curcumenolactone B | MTNR1B  |
| Curcumenolactone B | MAOB    |
| Curcumenolactone B | RPS6KA5 |
| Curcumenolactone B | NQO2    |
| Curcumenolactone B | PTGS1   |
| Curcumenolactone B | HSD17B2 |
| Curcumenolactone B | PRKCA   |
| Curcumenolactone B | HDAC6   |
| Curcumenolactone B | PLA2G1B |
| Curcumenolactone B | MAOA    |
| Curcumenolactone B | PTGS2   |
| Curcumenolactone B | TTL     |
| Curcumenolactone B | CTSK    |
| Curcumenolactone B | HMGCR   |
| Curcumenolactone B | CCR5    |
| Curcumenolactone B | PARP1   |
| Curcumenolactone B | HSD17B3 |
| Curcumenolactone B | CDC7    |
| Curcumenolactone B | GPR139  |
| Curcumenolactone B | CACNA1B |
| Curcumenolactone B | PPP2CA  |

|                    |          |
|--------------------|----------|
| Curcumenolactone B | SHBG     |
| Curcumenolactone B | CYP1A2   |
| Curcumenolactone B | SYK      |
| Curcumenolactone B | HTR2C    |
| Curcumenolactone B | MMP3     |
| Curcumenolactone B | MMP9     |
| Curcumenolactone B | MMP1     |
| Curcumenolactone B | PARP3    |
| Curcumenolactone B | PARP2    |
| Curcumenolactone B | PARP4    |
| Curcumenolactone B | TNKS     |
| Curcumenolactone B | CES2     |
| Curcumenolactone B | HTR2A    |
| Curcumenolactone B | ABCG2    |
| Curcumenolactone B | BRD4     |
| Curcumenolactone B | CAPN1    |
| Curcumenolactone B | SRD5A2   |
| Curcumenolactone B | CTSS     |
| Curcumenolactone B | CTSL     |
| Curcumenolactone B | CTSB     |
| Curcumenolactone B | MPO      |
| Curcumenolactone B | NR1I3    |
| Curcumenolactone B | F2       |
| Curcumenolactone B | PRSS1    |
| Curcumenolactone B | CA2      |
| Curcumenolactone B | IL1B     |
| Curcumenolactone B | CYP11B2  |
| Curcumenolactone B | TACR1    |
| Curcumenolactone B | PDCD4    |
| Curcumenolactone B | CMA1     |
| Curcumenolactone B | CTSG     |
| Curcumenolactone B | TSPO     |
| Curcumenolactone B | GABRA1   |
| Curcumenolactone B | HDAC8    |
| Curcumenolactone B | FAP      |
| Curcumenolactone B | GABRA5   |
| Curcumenolactone B | AKR1B1   |
| Curcumenolactone B | DPP4     |
| Curcumenolactone B | SCN2A    |
| Curcumenolactone B | SCN10A   |
| Curcumenolactone B | MAPK14   |
| Curcumenolactone B | MAPKAPK2 |
| Curcumenolactone B | RPS6KA3  |
| Curcumenolactone B | HMOX1    |
| Curcumenolactone B | GRK6     |
| Curcumenolactone B | IARS     |
| Curcumenolactone B | PTPN11   |
| Curcumenolactone B | IGF1R    |
| Curcumenolactone B | EPHX1    |
| Curcumenolactone B | HLCS     |
| Curcumenolactone B | LRRK2    |
| Curcumenolactone B | GSK3A    |
| Curcumenolactone B | ADAM17   |
| Curcumenolactone B | DYRK1A   |
| Epicurzerenone     | SLC6A4   |
| Epicurzerenone     | SLC6A3   |
| Epicurzerenone     | PTGS2    |
| Epicurzerenone     | PABPC1   |

|                  |         |
|------------------|---------|
| Epicurzerenone   | PREP    |
| Epicurzerenone   | CTSK    |
| Epicurzerenone   | CTSL    |
| Epicurzerenone   | CTSB    |
| Epicurzerenone   | HSD17B2 |
| Epicurzerenone   | EPHX1   |
| Epicurzerenone   | NLRP3   |
| Epicurzerenone   | MDM2    |
| Epicurzerenone   | HCRT1   |
| Epicurzerenone   | PTGS1   |
| Epicurzerenone   | NOS2    |
| Epicurzerenone   | AR      |
| Epicurzerenone   | HTR6    |
| Epicurzerenone   | CYP17A1 |
| Epicurzerenone   | CTSC    |
| Epicurzerenone   | CTSF    |
| Epicurzerenone   | CTSS    |
| Epicurzerenone   | CTSV    |
| Epicurzerenone   | CDC25B  |
| Furanogermenone  | SLC6A4  |
| Furanogermenone  | SLC6A3  |
| Furanogermenone  | AR      |
| Furanogermenone  | MTNR1A  |
| Furanogermenone  | PABPC1  |
| Furanogermenone  | CHRM2   |
| Furanogermenone  | CHRM1   |
| Furanogermenone  | KCNA5   |
| Furanogermenone  | CTSD    |
| Furanogermenone  | CTSS    |
| Furanogermenone  | CTSL    |
| Furanogermenone  | CTSB    |
| Furanogermenone  | PDE10A  |
| Furanogermenone  | TNKS2   |
| germacrone-13-al | CHRNA4  |
| germacrone-13-al | CHRNA3  |
| germacrone-13-al | GABRB3  |
| germacrone-13-al | GABRG2  |
| germacrone-13-al | GABRA5  |
| germacrone-13-al | PSEN2   |
| germacrone-13-al | PSENEN  |
| germacrone-13-al | NCSTN   |
| germacrone-13-al | APH1A   |
| germacrone-13-al | PSEN1   |
| germacrone-13-al | APH1B   |
| germacrone-13-al | PRKCG   |
| germacrone-13-al | PRKCD   |
| germacrone-13-al | EGFR    |
| germacrone-13-al | JAK1    |
| germacrone-13-al | JAK2    |
| germacrone-13-al | PER2    |
| germacrone-13-al | EPHX1   |
| germacrone-13-al | THRB    |
| germacrone-13-al | TGFBR1  |
| germacrone-13-al | EDNRA   |
| germacrone-13-al | GCGR    |
| germacrone-13-al | PRKCB   |
| germacrone-13-al | PRKCE   |
| germacrone-13-al | PRKCQ   |

|                  |          |
|------------------|----------|
| germacrone-13-al | CHRM4    |
| germacrone-13-al | CHRM5    |
| germacrone-13-al | CHRM2    |
| germacrone-13-al | CHRM1    |
| germacrone-13-al | CHRM3    |
| germacrone-13-al | CYP2C9   |
| germacrone-13-al | JAK3     |
| germacrone-13-al | TYK2     |
| germacrone-13-al | SLC6A2   |
| germacrone-13-al | RASGRP1  |
| germacrone-13-al | HSD17B2  |
| germacrone-13-al | IL6ST    |
| germacrone-13-al | KCNH2    |
| germacrone-13-al | MAPK8    |
| Gweicurculactone | CA3      |
| Gweicurculactone | CA12     |
| Gweicurculactone | CA14     |
| Gweicurculactone | CA9      |
| Gweicurculactone | CA13     |
| Gweicurculactone | CA5B     |
| Gweicurculactone | CA5A     |
| Gweicurculactone | CEL      |
| Gweicurculactone | KDR      |
| Gweicurculactone | JAK1     |
| Gweicurculactone | JAK2     |
| Gweicurculactone | PRKCA    |
| Gweicurculactone | AURKA    |
| Gweicurculactone | PDE7A    |
| Gweicurculactone | KIF11    |
| procumadiol      | ABCC9    |
| procumadiol      | KCNJ11   |
| procumadiol      | CDK5     |
| procumadiol      | CDK5R1   |
| procumadiol      | CYP19A1  |
| procumadiol      | AR       |
| procumadiol      | NR3C1    |
| procumadiol      | HSD11B1  |
| procumadiol      | ADAM17   |
| procumadiol      | AOC3     |
| procumadiol      | APP      |
| procumadiol      | BRD2     |
| procumadiol      | BRD4     |
| procumadiol      | CA3      |
| procumadiol      | CA4      |
| procumadiol      | CA5B     |
| procumadiol      | CA6      |
| procumadiol      | CA7      |
| procumadiol      | CA12     |
| procumadiol      | CA13     |
| procumadiol      | CA14     |
| procumadiol      | CES2     |
| procumadiol      | CDC7     |
| procumadiol      | SERPINA6 |
| procumadiol      | PTGS1    |
| procumadiol      | CYP11B1  |
| procumadiol      | CYP11B2  |
| procumadiol      | CYP17A1  |
| procumadiol      | ESR2     |

|                |        |
|----------------|--------|
| procurcumadiol | FABP1  |
| procurcumadiol | FKBP1A |
| procurcumadiol | GPBAR1 |
| procurcumadiol | GLUL   |
| procurcumadiol | HMOX1  |
| procurcumadiol | KAT2B  |
| procurcumadiol | IDO1   |
| procurcumadiol | IL6    |
| procurcumadiol | LRRK2  |
| procurcumadiol | LIPA   |
| procurcumadiol | MPEG1  |
| procurcumadiol | NR3C2  |
| procurcumadiol | MGLL   |
| procurcumadiol | CHRM1  |
| procurcumadiol | MPO    |
| procurcumadiol | NPC1L1 |
| procurcumadiol | RORA   |
| procurcumadiol | PPARD  |
| procurcumadiol | PDE10A |
| procurcumadiol | PTAFR  |
| procurcumadiol | PARP1  |
| procurcumadiol | PGR    |
| procurcumadiol | PTPN1  |
| procurcumadiol | FDFT1  |
| procurcumadiol | ABCC9  |
| procurcumadiol | TAAR1  |
| procurcumadiol | TRPM8  |
| procurcumadiol | JAK1   |
| procurcumadiol | JAK2   |
| procurcumadiol | JAK3   |
| procurcumadiol | TYK2   |
| turmeronol A   | KCNJ11 |
| turmeronol A   | ABCC9  |
| turmeronol A   | ATP4A  |
| turmeronol A   | ATP4B  |
| turmeronol A   | CCNB1  |
| turmeronol A   | CCNA2  |
| turmeronol A   | CCNA1  |
| turmeronol A   | CDK2   |
| turmeronol A   | CDK1   |
| turmeronol A   | CCNE1  |
| turmeronol A   | CDK4   |
| turmeronol A   | CDK2   |
| turmeronol A   | CCND1  |
| turmeronol A   | CDK5R1 |
| turmeronol A   | CDK5   |
| turmeronol A   | CDK5R1 |
| turmeronol A   | CHRNA4 |
| turmeronol A   | CHRNA3 |
| turmeronol A   | GABRB3 |
| turmeronol A   | GABRA3 |
| turmeronol A   | GABRG2 |
| turmeronol A   | GABRA2 |
| turmeronol A   | GABRB3 |
| turmeronol A   | GABRG2 |
| turmeronol A   | GABRB3 |
| turmeronol A   | GABRG2 |
| turmeronol A   | GABRA1 |

|              |         |
|--------------|---------|
| turmeronol A | GABRB3  |
| turmeronol A | GABRG2  |
| turmeronol A | GABRA5  |
| turmeronol A | PIK3CD  |
| turmeronol A | PIK3R1  |
| turmeronol A | PSEN2   |
| turmeronol A | PSENEN  |
| turmeronol A | NCSTN   |
| turmeronol A | APH1A   |
| turmeronol A | PSEN1   |
| turmeronol A | APH1B   |
| turmeronol A | ALOX5   |
| turmeronol A | NQO2    |
| turmeronol A | DRD5    |
| turmeronol A | MTNR1B  |
| turmeronol A | HSD17B2 |
| turmeronol A | AKT1    |
| turmeronol A | PRKCZ   |
| turmeronol A | NOS2    |
| turmeronol A | KDR     |
| turmeronol A | POLB    |
| turmeronol A | MMP9    |
| turmeronol A | MMP1    |
| turmeronol A | MMP2    |
| turmeronol A | FGFR1   |
| turmeronol A | ECE2    |
| turmeronol A | CA12    |
| turmeronol A | CA9     |
| turmeronol A | HTR1A   |
| turmeronol A | HTR3A   |
| turmeronol A | MYLK    |
| turmeronol A | MC4R    |
| turmeronol A | LRRK2   |
| turmeronol A | CASR    |
| turmeronol A | SRC     |
| turmeronol A | EGLN1   |
| turmeronol A | MAPK14  |
| turmeronol A | TGFBR1  |
| turmeronol A | GABRA1  |
| turmeronol A | RET     |
| turmeronol A | RIPK2   |
| turmeronol A | TSPO    |
| turmeronol A | P2RX3   |
| turmeronol A | AKR1B1  |
| turmeronol A | JAK3    |
| turmeronol A | JAK1    |
| turmeronol A | JAK2    |
| turmeronol A | TYK2    |
| turmeronol A | EPHX2   |
| turmeronol A | IGF1R   |
| turmeronol A | PDE2A   |
| turmeronol A | PDE10A  |
| turmeronol A | PIM1    |
| turmeronol A | PARP1   |
| turmeronol A | PIM3    |
| turmeronol A | CSNK1G1 |
| turmeronol A | CSNK1A1 |
| turmeronol A | CSNK1D  |

|              |         |
|--------------|---------|
| turmeronol A | FPR1    |
| turmeronol A | CDK5    |
| turmeronol A | CLK2    |
| turmeronol A | PTGS2   |
| turmeronol A | CTSD    |
| turmeronol A | CALM1   |
| turmeronol A | CDK2    |
| turmeronol A | CDK4    |
| turmeronol A | CACNA1B |
| turmeronol A | FLT3    |
| turmeronol A | GSK3B   |
| turmeronol A | TERT    |
| turmeronol A | MAPK1   |
| turmeronol A | LTA4H   |
| turmeronol A | HCRT2   |
| turmeronol A | HCRT1   |
| turmeronol A | NR1D1   |
| turmeronol A | DHFR    |
| turmeronol A | SIRT2   |
| turmeronol A | NPY5R   |
| turmeronol A | HSD17B1 |
| turmeronol A | MMP13   |
| turmeronol A | PLA2G2A |
| turmeronol A | PHLPP2  |
| turmeronol A | MAPK8   |
| turmeronol A | PDPK1   |
| turmeronol A | MAPK10  |
| turmeronol A | MPI     |
| turmeronol A | CTSS    |
| turmeronol A | BACE2   |
| turmeronol A | KCNMA1  |
| turmeronol A | PDE5A   |
| turmeronol A | CTSV    |
| turmeronol A | MAPK9   |
| turmeronol A | CDC7    |
| turmeronol A | GSK3A   |
| turmeronol A | BRAF    |
| turmeronol A | CNR1    |
| turmeronol A | NAMPT   |
| turmeronol A | TRPC6   |
| turmeronol A | NR3C1   |
| turmeronol A | CYP19A1 |
| turmeronol A | PTGS2   |
| turmeronol A | AR      |
| turmeronol A | ATP12A  |
| turmeronol A | HSD11B1 |
| turmeronol A | FKBP1A  |
| turmeronol A | NR3C2   |
| turmeronol A | PTAFR   |
| turmeronol A | LRRK2   |
| turmeronol A | HSD11B2 |
| turmeronol A | BRD4    |
| turmeronol A | BRD2    |
| turmeronol A | PGR     |
| turmeronol A | CDC7    |
| turmeronol A | SIGMAR1 |
| turmeronol A | TAAR1   |
| turmeronol A | APP     |



|              |          |
|--------------|----------|
| turmeronol A | CYP11B1  |
| turmeronol A | CYP11B2  |
| turmeronol A | CA2      |
| turmeronol A | CA7      |
| turmeronol A | CA1      |
| turmeronol A | CA3      |
| turmeronol A | CA6      |
| turmeronol A | CA12     |
| turmeronol A | CA14     |
| turmeronol A | CA9      |
| turmeronol A | CA4      |
| turmeronol A | CA13     |
| turmeronol A | CA5B     |
| turmeronol A | NPC1L1   |
| turmeronol A | IL6      |
| turmeronol A | GLUL     |
| turmeronol A | GPBAR1   |
| turmeronol A | FABP1    |
| turmeronol A | JAK3     |
| turmeronol A | JAK1     |
| turmeronol A | JAK2     |
| turmeronol A | TYK2     |
| turmeronol A | ABCC9    |
| turmeronol A | FABP4    |
| turmeronol A | PPARA    |
| turmeronol A | FABP3    |
| turmeronol A | FABP5    |
| turmeronol A | PTPN1    |
| turmeronol A | CD81     |
| turmeronol A | PTPN11   |
| turmeronol A | AKR1B10  |
| turmeronol A | HMOX1    |
| turmeronol A | NR1H4    |
| turmeronol A | FAAH     |
| turmeronol A | CYP51A1  |
| turmeronol A | LIPA     |
| turmeronol A | NR1H3    |
| turmeronol A | PTPRF    |
| turmeronol A | PTPN2    |
| turmeronol A | PLA2G1B  |
| turmeronol A | ACP1     |
| turmeronol A | G6PD     |
| turmeronol A | CYP17A1  |
| turmeronol A | PDE10A   |
| turmeronol A | SCD      |
| turmeronol A | AOC3     |
| turmeronol A | KCNA5    |
| turmeronol A | SERPINA6 |
| turmeronol A | SHBG     |
| zedoarondiol | CDK5     |
| zedoarondiol | CDK5R1   |
| zedoarondiol | PTGS2    |
| zedoarondiol | CYP19A1  |
| zedoarondiol | HSD11B1  |
| zedoarondiol | NR3C1    |
| zedoarondiol | BRD4     |
| zedoarondiol | BRD2     |
| zedoarondiol | NR3C2    |

|              |          |
|--------------|----------|
| zedoarondiol | ATP12A   |
| zedoarondiol | AR       |
| zedoarondiol | CDC7     |
| zedoarondiol | SERPINA6 |
| zedoarondiol | SHBG     |
| zedoarondiol | CA2      |
| zedoarondiol | CA1      |
| zedoarondiol | BACE1    |
| zedoarondiol | CA7      |
| zedoarondiol | CA3      |
| zedoarondiol | CA6      |
| zedoarondiol | CA12     |
| zedoarondiol | CA14     |
| zedoarondiol | CA9      |
| zedoarondiol | CA4      |
| zedoarondiol | CA13     |
| zedoarondiol | CA5B     |
| zedoarondiol | HSD11B2  |
| zedoarondiol | JAK1     |
| zedoarondiol | FKBP1A   |
| zedoarondiol | JAK3     |
| zedoarondiol | TYK2     |
| zedoarondiol | SIGMAR1  |
| zedoarondiol | LRRK2    |
| zedoarondiol | JAK2     |
| zedoarondiol | NPC1L1   |
| zedoarondiol | NOS2     |
| zedoarondiol | PGR      |
| zedoarondiol | CREBBP   |
| zedoarondiol | FABP4    |
| zedoarondiol | FABP3    |
| zedoarondiol | FABP5    |
| zedoarondiol | CYP11B1  |
| zedoarondiol | CYP11B2  |
| zedoarondiol | MTNR1A   |
| zedoarondiol | ABCC9    |
| zedoarondiol | NOS1     |
| zedoarondiol | NOS3     |
| zedoarondiol | PTPN1    |
| zedoarondiol | CD81     |
| zedoarondiol | PTPN11   |
| zedoarondiol | AKR1B10  |
| zedoarondiol | MIF      |
| zedoarondiol | APP      |
| zedoarondiol | NR1H4    |
| zedoarondiol | ADRB2    |
| zedoarondiol | ADRB1    |
| zedoarondiol | ADRB3    |
| zedoarondiol | PTAFR    |
| zedoarondiol | PRKDC    |
| zedoarondiol | PDE10A   |
| zedoarondiol | TRPM8    |
| zedoarondiol | HMGCR    |
| zedoarondiol | CYP17A1  |
| zedoarondiol | PARP1    |
| zedoarondiol | PIK3CD   |
| zedoarondiol | PIK3CB   |
| zedoarondiol | MAOA     |

|              |         |
|--------------|---------|
| zedoarondiol | NR1H3   |
| zedoarondiol | PTPN2   |
| zedoarondiol | PLA2G1B |
| zedoarondiol | ACP1    |
| zedoarondiol | G6PD    |
| zedoarondiol | AOC3    |
| zedoarondiol | PTGES   |
| zedoarondiol | SCD     |
| zedoarondiol | MPO     |
| zedoarondiol | CHEK1   |
| zedoarondiol | TAAR1   |
