# Supplementary material for: Network Pharmacology Prediction and Molecular Docking-Based Strategy to Discover the Potential Pharmacological Mechanism of Wen-Yu-Jin against Pulmonary Fibrosis in a Mouse Model
Source: Evid Based Complement Alternat Med. 2022 Feb 10;2022:7753508. doi: 10.1155/2022/7753508 (PMC8853792; doi:10.1155/2022/7753508)
Supplement: Supplementary Materials — Supplementary Table S1: information about WYJ-related targets. Supplementary Table S2: information about PF-related targets. Supplementary Table S3: targets information at the intersection of drug targets and disease targets. Supplementary Table S4: 48 key targets of WYJ against PF. Supplementary Table S5: core gene information filtered according to the “betweenness,” “closeness,” and “degree” values. Supplementary-Molecular Docking: information about molecular docking. [file 7753508.f1.zip]

Archive with 6 entries (6 files):
- 7753508.f1/Supplementary- Molecular Docking.pdf
- 7753508.f1/Supplementary Table S1.pdf
- 7753508.f1/Supplementary Table S2.pdf
- 7753508.f1/Supplementary Table S3.pdf
- 7753508.f1/Supplementary Table S4.pdf
- 7753508.f1/Supplementary Table S5.pdf
